# Supplementary material for: Along-shelf connectivity and circumpolar gene flow in Antarctic silverfish (Pleuragramma antarctica)
Source: PubMed Central journal article supplement (PMC6294782; doi:10.1038/s41598-018-36030-x), 2018-12-14
Supplement: 41598_2018_36030_MOESM1_ESM.pdf [file 41598_2018_36030_MOESM1_ESM.pdf]

**Supplementary Information** Along-shelf connectivity and circumpolar gene flow in Antarctic silverfish (*Pleuragramma antarctica*)

Jilda Alicia Caccavo<sup>1\*</sup>, Chiara Papetti<sup>1,2</sup>, Maj Wetjen<sup>3</sup>, Rainer Knust<sup>4</sup>, Julian R. Ashford<sup>5</sup>, Lorenzo Zane<sup>1,2</sup>

<sup>1</sup> Department of Biology, University of Padua, Via G. Colombo 3, Padua 35121, Italy.

<sup>2</sup> Consorzio Nazionale Interuniversitario per le Scienze del Mare (CoNISMa), Piazzale Flaminio 9, Rome 00196, Italy.

<sup>3</sup> Institute for Environmental Sciences, University of Koblenz-Landau, Fortstraße 7, Landau 76829, Germany.

<sup>4</sup> Helmholtz Center for Polar and Marine Research, Alfred Wegener Institute, Am Alten Hafen 26, Bremerhaven 27568, Germany.

<sup>5</sup> Department of Ocean, Earth and Atmospheric Sciences, Center for Quantitative Fisheries Ecology, Old Dominion University, 800 West 46<sup>th</sup> Street, Norfolk, VA 23508, United States.

**Corresponding author**

\* Jilda Alicia Caccavo, [ergo@jildacaccavo.com](mailto:ergo@jildacaccavo.com), ORCID: 0000-0002-8172-7855

**Table S1** Genetic variability of *Pleuragramma antarctica* for each locus across all nineteen sampling locations. Sample size ( $n$ ), number of alleles ( $N_A$ ), % of total observed alleles per locus per sampling location, allelic richness based on a minimum sample size of 14 individuals ( $A_R$ ), observed heterozygosity ( $H_O$ ), unbiased heterozygosity ( $H_E$ ) and probability of deviation from Hardy-Weinberg equilibrium ( $pHWE$ ) are shown. Values in bold indicate significant HWE deviations after correction for multiple tests as implemented in SGoF<sup>+</sup> (threshold for significance with 304 comparisons  $P = 0.008$ ). Sampling location acronyms are as in Table 1.

| Locus          | CI10 |       |       |       |       |       |                  |     | MB01  |       |       |       |       |        |     |       | MB02  |       |       |       |        |  |  |  |
|----------------|------|-------|-------|-------|-------|-------|------------------|-----|-------|-------|-------|-------|-------|--------|-----|-------|-------|-------|-------|-------|--------|--|--|--|
|                | $n$  | $N_A$ | %     | $A_R$ | $H_O$ | $H_E$ | $pHWE$           | $n$ | $N_A$ | %     | $A_R$ | $H_O$ | $H_E$ | $pHWE$ | $n$ | $N_A$ | %     | $A_R$ | $H_O$ | $H_E$ | $pHWE$ |  |  |  |
| <b>Ch126</b>   | 60   | 3     | 42.86 | 2.21  | 0.45  | 0.51  | 0.300            | 28  | 3     | 42.86 | 2.38  | 0.46  | 0.51  | 0.711  | 49  | 4     | 57.14 | 3.00  | 0.59  | 0.55  | 0.763  |  |  |  |
| <b>Ch520</b>   | 60   | 4     | 50.00 | 3.09  | 0.33  | 0.38  | 0.488            | 28  | 4     | 50.00 | 3.38  | 0.39  | 0.51  | 0.020  | 49  | 5     | 62.50 | 3.70  | 0.47  | 0.48  | 0.754  |  |  |  |
| <b>Ch623</b>   | 60   | 23    | 69.70 | 14.35 | 0.92  | 0.94  | <b>&lt;0.001</b> | 28  | 20    | 60.61 | 12.75 | 0.96  | 0.92  | 0.219  | 49  | 20    | 60.61 | 12.82 | 0.90  | 0.92  | 0.975  |  |  |  |
| <b>Ch10105</b> | 60   | 6     | 66.67 | 3.54  | 0.30  | 0.31  | 0.146            | 28  | 3     | 33.33 | 1.86  | 0.07  | 0.07  | 1.000  | 49  | 5     | 55.56 | 2.89  | 0.24  | 0.24  | 0.182  |  |  |  |
| <b>Ch10857</b> | 60   | 9     | 52.94 | 6.34  | 0.68  | 0.69  | 0.903            | 28  | 9     | 52.94 | 6.03  | 0.54  | 0.66  | 0.091  | 49  | 7     | 41.18 | 5.59  | 0.57  | 0.67  | 0.702  |  |  |  |
| <b>Ch13222</b> | 60   | 3     | 50.00 | 2.26  | 0.17  | 0.16  | 1.000            | 28  | 2     | 33.33 | 1.94  | 0.18  | 0.16  | 1.000  | 49  | 4     | 66.67 | 1.75  | 0.06  | 0.06  | 1.000  |  |  |  |
| <b>Ch18085</b> | 60   | 10    | 71.43 | 7.29  | 0.83  | 0.83  | 0.852            | 28  | 9     | 64.29 | 6.98  | 0.86  | 0.82  | 0.790  | 49  | 9     | 64.29 | 7.02  | 0.86  | 0.83  | 0.998  |  |  |  |
| <b>Ch2931</b>  | 60   | 10    | 58.82 | 6.96  | 0.73  | 0.83  | 0.891            | 28  | 10    | 58.82 | 7.55  | 0.86  | 0.82  | 0.165  | 49  | 11    | 64.71 | 7.09  | 0.84  | 0.82  | 0.370  |  |  |  |
| <b>Ch4796</b>  | 60   | 13    | 72.22 | 9.07  | 0.75  | 0.87  | <b>0.002</b>     | 28  | 12    | 66.67 | 9.71  | 0.96  | 0.88  | 0.985  | 49  | 14    | 77.78 | 10.09 | 0.94  | 0.89  | 0.793  |  |  |  |
| <b>Ch10441</b> | 60   | 9     | 39.13 | 5.36  | 0.65  | 0.65  | 0.643            | 28  | 10    | 43.48 | 7.17  | 0.86  | 0.76  | 0.535  | 49  | 9     | 39.13 | 6.00  | 0.61  | 0.68  | 0.524  |  |  |  |
| <b>Ch11230</b> | 60   | 7     | 50.00 | 4.90  | 0.77  | 0.72  | 0.744            | 28  | 5     | 35.71 | 4.69  | 0.71  | 0.71  | 0.996  | 49  | 7     | 50.00 | 5.00  | 0.78  | 0.72  | 1.000  |  |  |  |
| <b>Ch11483</b> | 60   | 10    | 66.67 | 5.43  | 0.47  | 0.56  | 0.675            | 28  | 9     | 60.00 | 6.26  | 0.57  | 0.64  | 0.409  | 49  | 9     | 60.00 | 4.67  | 0.45  | 0.46  | 0.096  |  |  |  |
| <b>Ch17977</b> | 60   | 8     | 53.33 | 5.08  | 0.58  | 0.63  | 0.722            | 28  | 4     | 26.67 | 3.60  | 0.57  | 0.56  | 0.955  | 49  | 7     | 46.67 | 4.60  | 0.65  | 0.62  | 0.509  |  |  |  |
| <b>Ch19846</b> | 60   | 8     | 66.67 | 6.26  | 0.70  | 0.78  | 0.690            | 28  | 8     | 66.67 | 6.56  | 0.86  | 0.78  | 0.996  | 49  | 8     | 66.67 | 6.52  | 0.86  | 0.80  | 0.941  |  |  |  |
| <b>Ch24332</b> | 60   | 6     | 60.00 | 4.02  | 0.60  | 0.62  | 0.096            | 28  | 5     | 50.00 | 3.92  | 0.57  | 0.60  | 0.320  | 49  | 5     | 50.00 | 3.70  | 0.73  | 0.62  | 0.184  |  |  |  |
| <b>Ch25478</b> | 60   | 4     | 25.00 | 2.96  | 0.57  | 0.56  | 0.422            | 28  | 4     | 25.00 | 3.04  | 0.46  | 0.56  | 0.036  | 49  | 6     | 37.50 | 3.69  | 0.61  | 0.63  | 0.341  |  |  |  |

| Locus          | MB10     |                      |       |                      |                      |                      |                  | MB11     |                      |       |                      |                      |                      | JI07             |          |                      |       |                      |                      |                      |             |
|----------------|----------|----------------------|-------|----------------------|----------------------|----------------------|------------------|----------|----------------------|-------|----------------------|----------------------|----------------------|------------------|----------|----------------------|-------|----------------------|----------------------|----------------------|-------------|
|                | <i>n</i> | <i>N<sub>A</sub></i> | %     | <i>A<sub>R</sub></i> | <i>H<sub>O</sub></i> | <i>H<sub>E</sub></i> | <i>pHWE</i>      | <i>n</i> | <i>N<sub>A</sub></i> | %     | <i>A<sub>R</sub></i> | <i>H<sub>O</sub></i> | <i>H<sub>E</sub></i> | <i>pHWE</i>      | <i>n</i> | <i>N<sub>A</sub></i> | %     | <i>A<sub>R</sub></i> | <i>H<sub>O</sub></i> | <i>H<sub>E</sub></i> | <i>pHWE</i> |
| <b>Ch126</b>   | 60       | 4                    | 57.14 | 2.40                 | 0.43                 | 0.52                 | 0.205            | 83       | 3                    | 42.86 | 2.77                 | 0.58                 | 0.55                 | 0.661            | 34       | 5                    | 71.43 | 3.22                 | 0.56                 | 0.54                 | 1.000       |
| <b>Ch520</b>   | 60       | 5                    | 62.50 | 4.07                 | 0.62                 | 0.56                 | 0.855            | 83       | 5                    | 62.50 | 3.58                 | 0.45                 | 0.40                 | 0.712            | 34       | 3                    | 37.50 | 2.95                 | 0.50                 | 0.41                 | 0.362       |
| <b>Ch623</b>   | 60       | 24                   | 72.73 | 13.71                | 0.93                 | 0.93                 | 0.038            | 83       | 25                   | 75.76 | 13.58                | 0.89                 | 0.93                 | 0.012            | 34       | 22                   | 66.67 | 13.01                | 0.97                 | 0.92                 | 0.106       |
| <b>Ch10105</b> | 60       | 4                    | 44.44 | 2.88                 | 0.22                 | 0.21                 | 0.594            | 83       | 5                    | 55.56 | 3.16                 | 0.25                 | 0.23                 | 0.680            | 34       | 4                    | 44.44 | 2.99                 | 0.24                 | 0.22                 | 1.000       |
| <b>Ch10857</b> | 60       | 11                   | 64.71 | 6.36                 | 0.75                 | 0.73                 | 0.121            | 83       | 10                   | 58.82 | 6.32                 | 0.73                 | 0.71                 | 0.937            | 34       | 7                    | 41.18 | 5.29                 | 0.76                 | 0.74                 | 0.716       |
| <b>Ch13222</b> | 60       | 4                    | 66.67 | 2.40                 | 0.25                 | 0.22                 | 1.000            | 83       | 3                    | 50.00 | 1.94                 | 0.10                 | 0.10                 | <b>&lt;0.001</b> | 34       | 3                    | 50.00 | 2.31                 | 0.21                 | 0.23                 | 1.000       |
| <b>Ch18085</b> | 60       | 10                   | 71.43 | 7.21                 | 0.83                 | 0.83                 | 0.171            | 83       | 11                   | 78.57 | 7.05                 | 0.87                 | 0.82                 | 0.959            | 34       | 10                   | 71.43 | 7.47                 | 0.76                 | 0.82                 | 0.715       |
| <b>Ch2931</b>  | 60       | 10                   | 58.82 | 7.52                 | 0.83                 | 0.81                 | 0.998            | 83       | 10                   | 58.82 | 6.91                 | 0.73                 | 0.81                 | 0.279            | 34       | 10                   | 58.82 | 7.61                 | 0.71                 | 0.84                 | 0.333       |
| <b>Ch4796</b>  | 60       | 13                   | 72.22 | 9.37                 | 0.82                 | 0.88                 | 0.996            | 83       | 14                   | 77.78 | 10.72                | 0.93                 | 0.90                 | 1.000            | 34       | 11                   | 61.11 | 9.11                 | 1.00                 | 0.88                 | 1.000       |
| <b>Ch10441</b> | 60       | 11                   | 47.83 | 7.20                 | 0.73                 | 0.71                 | 0.436            | 83       | 12                   | 52.17 | 6.09                 | 0.69                 | 0.68                 | 0.989            | 34       | 9                    | 39.13 | 5.85                 | 0.74                 | 0.66                 | 0.289       |
| <b>Ch11230</b> | 60       | 8                    | 57.14 | 5.68                 | 0.68                 | 0.76                 | 0.986            | 83       | 6                    | 42.86 | 4.64                 | 0.80                 | 0.73                 | 0.603            | 34       | 7                    | 50.00 | 5.71                 | 0.88                 | 0.76                 | 0.547       |
| <b>Ch11483</b> | 60       | 8                    | 53.33 | 5.20                 | 0.65                 | 0.57                 | 0.597            | 83       | 8                    | 53.33 | 4.26                 | 0.55                 | 0.56                 | 0.461            | 34       | 5                    | 33.33 | 3.77                 | 0.59                 | 0.48                 | 0.606       |
| <b>Ch17977</b> | 60       | 9                    | 60.00 | 5.13                 | 0.62                 | 0.66                 | <b>&lt;0.001</b> | 83       | 10                   | 66.67 | 4.85                 | 0.58                 | 0.58                 | 0.013            | 34       | 7                    | 46.67 | 5.73                 | 0.68                 | 0.69                 | 0.828       |
| <b>Ch19846</b> | 60       | 8                    | 66.67 | 6.45                 | 0.87                 | 0.80                 | 0.216            | 83       | 8                    | 66.67 | 6.04                 | 0.71                 | 0.78                 | 0.618            | 34       | 7                    | 58.33 | 5.72                 | 0.76                 | 0.77                 | 0.385       |
| <b>Ch24332</b> | 60       | 6                    | 60.00 | 4.64                 | 0.60                 | 0.65                 | 0.934            | 83       | 7                    | 70.00 | 4.55                 | 0.69                 | 0.63                 | 0.914            | 34       | 4                    | 40.00 | 3.79                 | 0.62                 | 0.64                 | 0.800       |
| <b>Ch25478</b> | 60       | 6                    | 37.50 | 4.43                 | 0.68                 | 0.64                 | 0.018            | 83       | 8                    | 50.00 | 4.45                 | 0.64                 | 0.63                 | 0.686            | 34       | 7                    | 43.75 | 4.12                 | 0.47                 | 0.61                 | 0.019       |

| Locus          | J110     |                      |        |                      |                      |                      |                  | J112     |                      |       |                      |                      |                      |             | SSI96    |                      |       |                      |                      |                      |                  |
|----------------|----------|----------------------|--------|----------------------|----------------------|----------------------|------------------|----------|----------------------|-------|----------------------|----------------------|----------------------|-------------|----------|----------------------|-------|----------------------|----------------------|----------------------|------------------|
|                | <i>n</i> | <i>N<sub>A</sub></i> | %      | <i>A<sub>R</sub></i> | <i>H<sub>O</sub></i> | <i>H<sub>E</sub></i> | <i>pHWE</i>      | <i>n</i> | <i>N<sub>A</sub></i> | %     | <i>A<sub>R</sub></i> | <i>H<sub>O</sub></i> | <i>H<sub>E</sub></i> | <i>pHWE</i> | <i>n</i> | <i>N<sub>A</sub></i> | %     | <i>A<sub>R</sub></i> | <i>H<sub>O</sub></i> | <i>H<sub>E</sub></i> | <i>pHWE</i>      |
| <b>Ch126</b>   | 148      | 6                    | 85.71  | 3.08                 | 0.63                 | 0.55                 | 0.384            | 54       | 5                    | 71.43 | 3.00                 | 0.50                 | 0.54                 | 1.000       | 14       | 2                    | 28.57 | 2.00                 | 0.57                 | 0.49                 | 0.620            |
| <b>Ch520</b>   | 148      | 8                    | 100.00 | 4.15                 | 0.57                 | 0.58                 | 0.713            | 54       | 6                    | 75.00 | 3.87                 | 0.44                 | 0.51                 | 0.210       | 14       | 5                    | 62.50 | 4.15                 | 0.50                 | 0.42                 | 1.000            |
| <b>Ch623</b>   | 148      | 28                   | 84.85  | 13.77                | 0.91                 | 0.94                 | 0.574            | 54       | 20                   | 60.61 | 12.56                | 0.80                 | 0.92                 | 0.092       | 14       | 15                   | 45.45 | 11.59                | 0.86                 | 0.91                 | <b>&lt;0.001</b> |
| <b>Ch10105</b> | 148      | 6                    | 66.67  | 3.72                 | 0.32                 | 0.37                 | 0.074            | 54       | 5                    | 55.56 | 3.35                 | 0.20                 | 0.25                 | 0.359       | 14       | 3                    | 33.33 | 2.66                 | 0.36                 | 0.30                 | 1.000            |
| <b>Ch10857</b> | 148      | 12                   | 70.59  | 6.60                 | 0.70                 | 0.74                 | 0.858            | 54       | 11                   | 64.71 | 6.33                 | 0.74                 | 0.71                 | 0.090       | 14       | 5                    | 29.41 | 4.59                 | 0.64                 | 0.69                 | 0.170            |
| <b>Ch13222</b> | 148      | 4                    | 66.67  | 2.26                 | 0.16                 | 0.17                 | 0.718            | 54       | 3                    | 50.00 | 2.10                 | 0.15                 | 0.14                 | 1.000       | 14       | 3                    | 50.00 | 2.29                 | 0.14                 | 0.14                 | 1.000            |
| <b>Ch18085</b> | 148      | 12                   | 85.71  | 7.69                 | 0.84                 | 0.85                 | 0.931            | 54       | 8                    | 57.14 | 6.78                 | 0.85                 | 0.81                 | 0.507       | 14       | 6                    | 42.86 | 5.74                 | 0.71                 | 0.80                 | 0.879            |
| <b>Ch2931</b>  | 148      | 10                   | 58.82  | 7.02                 | 0.78                 | 0.81                 | 0.297            | 54       | 8                    | 47.06 | 6.19                 | 0.67                 | 0.82                 | 0.999       | 14       | 7                    | 41.18 | 6.39                 | 0.79                 | 0.82                 | 0.475            |
| <b>Ch4796</b>  | 148      | 14                   | 77.78  | 9.56                 | 0.82                 | 0.89                 | 0.491            | 54       | 12                   | 66.67 | 8.86                 | 0.98                 | 0.87                 | 0.991       | 14       | 11                   | 61.11 | 8.89                 | 0.93                 | 0.86                 | 0.009            |
| <b>Ch10441</b> | 148      | 17                   | 73.91  | 6.54                 | 0.67                 | 0.70                 | <b>&lt;0.001</b> | 54       | 7                    | 30.43 | 5.13                 | 0.67                 | 0.66                 | 0.910       | 14       | 6                    | 26.09 | 5.48                 | 0.64                 | 0.72                 | 0.136            |
| <b>Ch11230</b> | 148      | 9                    | 64.29  | 5.23                 | 0.74                 | 0.74                 | 0.860            | 54       | 7                    | 50.00 | 5.18                 | 0.69                 | 0.70                 | 0.222       | 14       | 5                    | 35.71 | 4.59                 | 0.57                 | 0.73                 | 0.842            |
| <b>Ch11483</b> | 148      | 12                   | 80.00  | 5.06                 | 0.55                 | 0.58                 | <b>&lt;0.001</b> | 54       | 8                    | 53.33 | 4.43                 | 0.54                 | 0.57                 | 0.739       | 14       | 5                    | 33.33 | 3.80                 | 0.29                 | 0.37                 | 0.082            |
| <b>Ch17977</b> | 148      | 9                    | 60.00  | 5.20                 | 0.60                 | 0.63                 | 0.035            | 54       | 8                    | 53.33 | 5.52                 | 0.63                 | 0.63                 | 0.308       | 14       | 4                    | 26.67 | 3.53                 | 0.64                 | 0.56                 | 0.663            |
| <b>Ch19846</b> | 148      | 10                   | 83.33  | 6.36                 | 0.80                 | 0.79                 | 0.250            | 54       | 8                    | 66.67 | 6.50                 | 0.78                 | 0.79                 | 0.386       | 14       | 8                    | 66.67 | 7.07                 | 0.86                 | 0.83                 | 0.811            |
| <b>Ch24332</b> | 148      | 8                    | 80.00  | 4.87                 | 0.62                 | 0.65                 | 0.842            | 54       | 6                    | 60.00 | 3.80                 | 0.57                 | 0.59                 | 0.013       | 14       | 5                    | 50.00 | 3.97                 | 0.71                 | 0.62                 | <b>0.006</b>     |
| <b>Ch25478</b> | 148      | 9                    | 56.25  | 4.45                 | 0.67                 | 0.63                 | 0.267            | 54       | 5                    | 31.25 | 3.39                 | 0.56                 | 0.59                 | 0.023       | 14       | 3                    | 18.75 | 2.65                 | 0.50                 | 0.53                 | 0.594            |

| Locus          | SO11     |                      |       |                      |                      |                      |                  | LB07     |                      |       |                      |                      |                      | LB11         |          |                      |       |                      |                      |                      |              |
|----------------|----------|----------------------|-------|----------------------|----------------------|----------------------|------------------|----------|----------------------|-------|----------------------|----------------------|----------------------|--------------|----------|----------------------|-------|----------------------|----------------------|----------------------|--------------|
|                | <i>n</i> | <i>N<sub>A</sub></i> | %     | <i>A<sub>R</sub></i> | <i>H<sub>O</sub></i> | <i>H<sub>E</sub></i> | <i>pHWE</i>      | <i>n</i> | <i>N<sub>A</sub></i> | %     | <i>A<sub>R</sub></i> | <i>H<sub>O</sub></i> | <i>H<sub>E</sub></i> | <i>pHWE</i>  | <i>n</i> | <i>N<sub>A</sub></i> | %     | <i>A<sub>R</sub></i> | <i>H<sub>O</sub></i> | <i>H<sub>E</sub></i> | <i>pHWE</i>  |
| <b>Ch126</b>   | 47       | 3                    | 42.86 | 2.24                 | 0.40                 | 0.50                 | 0.140            | 46       | 3                    | 42.86 | 2.72                 | 0.65                 | 0.49                 | 0.152        | 52       | 3                    | 42.86 | 2.57                 | 0.60                 | 0.52                 | 0.879        |
| <b>Ch520</b>   | 47       | 6                    | 75.00 | 4.54                 | 0.51                 | 0.60                 | 0.108            | 46       | 5                    | 62.50 | 3.96                 | 0.50                 | 0.60                 | 0.328        | 52       | 7                    | 87.50 | 4.52                 | 0.58                 | 0.57                 | 0.948        |
| <b>Ch623</b>   | 47       | 18                   | 54.55 | 12.21                | 0.91                 | 0.92                 | 1.000            | 46       | 20                   | 60.61 | 12.82                | 0.87                 | 0.93                 | 0.997        | 52       | 21                   | 63.64 | 13.57                | 0.88                 | 0.93                 | 1.000        |
| <b>Ch10105</b> | 47       | 6                    | 66.67 | 3.93                 | 0.36                 | 0.35                 | 0.329            | 46       | 4                    | 44.44 | 2.66                 | 0.17                 | 0.18                 | <b>0.001</b> | 52       | 5                    | 55.56 | 2.88                 | 0.23                 | 0.21                 | 1.000        |
| <b>Ch10857</b> | 47       | 9                    | 52.94 | 6.25                 | 0.72                 | 0.66                 | 0.938            | 46       | 9                    | 52.94 | 5.74                 | 0.54                 | 0.63                 | 0.816        | 52       | 10                   | 58.82 | 6.23                 | 0.73                 | 0.74                 | 0.713        |
| <b>Ch13222</b> | 47       | 3                    | 50.00 | 2.24                 | 0.19                 | 0.21                 | 1.000            | 46       | 3                    | 50.00 | 1.86                 | 0.04                 | 0.12                 | <b>0.001</b> | 52       | 2                    | 33.33 | 1.91                 | 0.15                 | 0.14                 | 1.000        |
| <b>Ch18085</b> | 47       | 8                    | 57.14 | 6.59                 | 0.91                 | 0.80                 | 0.997            | 46       | 8                    | 57.14 | 6.69                 | 0.83                 | 0.82                 | 0.861        | 52       | 9                    | 64.29 | 7.20                 | 0.88                 | 0.82                 | 0.869        |
| <b>Ch2931</b>  | 47       | 9                    | 52.94 | 6.75                 | 0.70                 | 0.82                 | 0.444            | 46       | 11                   | 64.71 | 7.75                 | 0.78                 | 0.83                 | 0.939        | 52       | 9                    | 52.94 | 6.96                 | 0.77                 | 0.83                 | 0.172        |
| <b>Ch4796</b>  | 47       | 12                   | 66.67 | 8.74                 | 0.79                 | 0.87                 | 0.902            | 46       | 10                   | 55.56 | 7.88                 | 0.91                 | 0.86                 | 0.921        | 52       | 12                   | 66.67 | 9.13                 | 0.92                 | 0.88                 | 1.000        |
| <b>Ch10441</b> | 47       | 7                    | 30.43 | 4.88                 | 0.49                 | 0.56                 | 0.111            | 46       | 11                   | 47.83 | 6.74                 | 0.70                 | 0.70                 | 0.142        | 52       | 10                   | 43.48 | 6.07                 | 0.58                 | 0.63                 | 0.046        |
| <b>Ch11230</b> | 47       | 6                    | 42.86 | 4.79                 | 0.64                 | 0.68                 | 0.847            | 46       | 6                    | 42.86 | 5.12                 | 0.70                 | 0.74                 | 0.781        | 52       | 7                    | 50.00 | 5.19                 | 0.73                 | 0.72                 | 0.105        |
| <b>Ch11483</b> | 47       | 7                    | 46.67 | 4.85                 | 0.60                 | 0.55                 | 0.764            | 46       | 7                    | 46.67 | 4.63                 | 0.61                 | 0.55                 | 0.597        | 52       | 7                    | 46.67 | 4.49                 | 0.48                 | 0.50                 | <b>0.001</b> |
| <b>Ch17977</b> | 47       | 8                    | 53.33 | 5.58                 | 0.60                 | 0.59                 | 0.728            | 46       | 6                    | 40.00 | 4.38                 | 0.54                 | 0.57                 | 0.982        | 52       | 8                    | 53.33 | 4.82                 | 0.67                 | 0.64                 | 0.996        |
| <b>Ch19846</b> | 47       | 7                    | 58.33 | 5.79                 | 0.66                 | 0.73                 | 0.744            | 46       | 9                    | 75.00 | 6.46                 | 0.83                 | 0.78                 | 0.587        | 52       | 10                   | 83.33 | 7.11                 | 0.88                 | 0.82                 | 0.852        |
| <b>Ch24332</b> | 47       | 8                    | 80.00 | 4.81                 | 0.64                 | 0.67                 | 0.757            | 46       | 6                    | 60.00 | 4.35                 | 0.57                 | 0.65                 | 0.579        | 52       | 8                    | 80.00 | 4.97                 | 0.60                 | 0.69                 | 0.455        |
| <b>Ch25478</b> | 47       | 8                    | 50.00 | 4.50                 | 0.55                 | 0.64                 | <b>&lt;0.001</b> | 46       | 5                    | 31.25 | 3.79                 | 0.67                 | 0.59                 | 0.784        | 52       | 7                    | 43.75 | 3.82                 | 0.50                 | 0.59                 | <b>0.005</b> |

| Locus          | FT14     |                      |       |                      |                      |                      |             | HB89     |                      |       |                      |                      |                      | HB91             |          |                      |       |                      |                      |                      |                  |
|----------------|----------|----------------------|-------|----------------------|----------------------|----------------------|-------------|----------|----------------------|-------|----------------------|----------------------|----------------------|------------------|----------|----------------------|-------|----------------------|----------------------|----------------------|------------------|
|                | <i>n</i> | <i>N<sub>A</sub></i> | %     | <i>A<sub>R</sub></i> | <i>H<sub>O</sub></i> | <i>H<sub>E</sub></i> | <i>pHWE</i> | <i>n</i> | <i>N<sub>A</sub></i> | %     | <i>A<sub>R</sub></i> | <i>H<sub>O</sub></i> | <i>H<sub>E</sub></i> | <i>pHWE</i>      | <i>n</i> | <i>N<sub>A</sub></i> | %     | <i>A<sub>R</sub></i> | <i>H<sub>O</sub></i> | <i>H<sub>E</sub></i> | <i>pHWE</i>      |
| <b>Ch126</b>   | 50       | 4                    | 57.14 | 3.07                 | 0.50                 | 0.56                 | 1.000       | 19       | 2                    | 28.57 | 2.00                 | 0.53                 | 0.49                 | 1.000            | 41       | 3                    | 42.86 | 2.49                 | 0.51                 | 0.51                 | 1.000            |
| <b>Ch520</b>   | 50       | 5                    | 62.50 | 3.79                 | 0.56                 | 0.49                 | 0.791       | 19       | 4                    | 50.00 | 3.91                 | 0.63                 | 0.60                 | 0.228            | 41       | 7                    | 87.50 | 4.67                 | 0.51                 | 0.57                 | <b>&lt;0.001</b> |
| <b>Ch623</b>   | 50       | 17                   | 51.52 | 12.04                | 0.96                 | 0.92                 | 0.025       | 19       | 11                   | 33.33 | 8.73                 | 0.74                 | 0.85                 | 0.516            | 41       | 21                   | 63.64 | 13.07                | 0.98                 | 0.93                 | 0.569            |
| <b>Ch10105</b> | 50       | 4                    | 44.44 | 2.69                 | 0.18                 | 0.17                 | 1.000       | 19       | 4                    | 44.44 | 3.69                 | 0.47                 | 0.46                 | 0.545            | 41       | 5                    | 55.56 | 3.21                 | 0.27                 | 0.28                 | 0.364            |
| <b>Ch10857</b> | 50       | 8                    | 47.06 | 5.62                 | 0.58                 | 0.70                 | 0.389       | 19       | 6                    | 35.29 | 5.32                 | 0.74                 | 0.65                 | 0.487            | 41       | 8                    | 47.06 | 6.51                 | 0.78                 | 0.75                 | 0.773            |
| <b>Ch13222</b> | 50       | 2                    | 33.33 | 1.99                 | 0.30                 | 0.26                 | 0.046       | 19       | 3                    | 50.00 | 2.36                 | 0.16                 | 0.15                 | 1.000            | 41       | 4                    | 66.67 | 2.45                 | 0.15                 | 0.14                 | 1.000            |
| <b>Ch18085</b> | 50       | 10                   | 71.43 | 7.23                 | 0.72                 | 0.83                 | 0.121       | 19       | 9                    | 64.29 | 7.46                 | 0.89                 | 0.83                 | 0.534            | 41       | 7                    | 50.00 | 6.59                 | 0.78                 | 0.82                 | 0.999            |
| <b>Ch2931</b>  | 50       | 11                   | 64.71 | 7.55                 | 0.80                 | 0.83                 | 0.553       | 19       | 8                    | 47.06 | 7.06                 | 0.63                 | 0.82                 | 0.574            | 41       | 9                    | 52.94 | 6.72                 | 0.63                 | 0.81                 | 0.249            |
| <b>Ch4796</b>  | 50       | 13                   | 72.22 | 9.41                 | 0.96                 | 0.88                 | 0.999       | 19       | 9                    | 50.00 | 7.77                 | 0.84                 | 0.86                 | 1.000            | 41       | 13                   | 72.22 | 9.69                 | 0.98                 | 0.88                 | 1.000            |
| <b>Ch10441</b> | 50       | 8                    | 34.78 | 5.72                 | 0.62                 | 0.64                 | 0.855       | 19       | 8                    | 34.78 | 6.19                 | 0.84                 | 0.73                 | 0.102            | 41       | 7                    | 30.43 | 5.15                 | 0.46                 | 0.62                 | <b>&lt;0.001</b> |
| <b>Ch11230</b> | 50       | 6                    | 42.86 | 4.86                 | 0.64                 | 0.70                 | 0.811       | 19       | 6                    | 42.86 | 5.11                 | 0.63                 | 0.71                 | 0.884            | 41       | 7                    | 50.00 | 5.55                 | 0.71                 | 0.73                 | 0.698            |
| <b>Ch11483</b> | 50       | 8                    | 53.33 | 5.34                 | 0.52                 | 0.54                 | 0.772       | 19       | 6                    | 40.00 | 4.42                 | 0.47                 | 0.58                 | <b>&lt;0.001</b> | 41       | 6                    | 40.00 | 4.06                 | 0.56                 | 0.54                 | 0.543            |
| <b>Ch17977</b> | 50       | 8                    | 53.33 | 5.08                 | 0.58                 | 0.59                 | 0.082       | 19       | 4                    | 26.67 | 3.70                 | 0.58                 | 0.54                 | 0.690            | 41       | 6                    | 40.00 | 4.47                 | 0.56                 | 0.63                 | 0.419            |
| <b>Ch19846</b> | 50       | 9                    | 75.00 | 6.60                 | 0.74                 | 0.81                 | 0.999       | 19       | 8                    | 66.67 | 6.63                 | 0.89                 | 0.80                 | 0.075            | 41       | 10                   | 83.33 | 7.17                 | 0.80                 | 0.81                 | 0.996            |
| <b>Ch24332</b> | 50       | 8                    | 80.00 | 4.91                 | 0.68                 | 0.65                 | 1.000       | 19       | 4                    | 40.00 | 3.52                 | 0.42                 | 0.63                 | 0.011            | 41       | 6                    | 60.00 | 4.31                 | 0.76                 | 0.64                 | 0.666            |
| <b>Ch25478</b> | 50       | 8                    | 50.00 | 4.53                 | 0.66                 | 0.62                 | 0.975       | 19       | 6                    | 37.50 | 4.13                 | 0.47                 | 0.55                 | 1.000            | 41       | 7                    | 43.75 | 4.47                 | 0.68                 | 0.64                 | 0.542            |

| Locus          | HB14     |                      |       |                      |                      |                      |             | AB14     |                      |       |                      |                      |                      | RS96             |          |                      |        |                      |                      |                      |             |
|----------------|----------|----------------------|-------|----------------------|----------------------|----------------------|-------------|----------|----------------------|-------|----------------------|----------------------|----------------------|------------------|----------|----------------------|--------|----------------------|----------------------|----------------------|-------------|
|                | <i>n</i> | <i>N<sub>A</sub></i> | %     | <i>A<sub>R</sub></i> | <i>H<sub>O</sub></i> | <i>H<sub>E</sub></i> | <i>pHWE</i> | <i>n</i> | <i>N<sub>A</sub></i> | %     | <i>A<sub>R</sub></i> | <i>H<sub>O</sub></i> | <i>H<sub>E</sub></i> | <i>pHWE</i>      | <i>n</i> | <i>N<sub>A</sub></i> | %      | <i>A<sub>R</sub></i> | <i>H<sub>O</sub></i> | <i>H<sub>E</sub></i> | <i>pHWE</i> |
| <b>Ch126</b>   | 82       | 5                    | 71.43 | 2.81                 | 0.57                 | 0.53                 | 0.017       | 25       | 3                    | 42.86 | 2.84                 | 0.60                 | 0.55                 | 1.000            | 91       | 3                    | 42.86  | 2.62                 | 0.55                 | 0.52                 | 0.331       |
| <b>Ch520</b>   | 82       | 7                    | 87.50 | 4.23                 | 0.57                 | 0.54                 | 0.391       | 25       | 5                    | 62.50 | 3.76                 | 0.48                 | 0.47                 | <b>&lt;0.001</b> | 91       | 7                    | 87.50  | 4.04                 | 0.58                 | 0.52                 | 0.069       |
| <b>Ch623</b>   | 82       | 21                   | 63.64 | 12.94                | 0.87                 | 0.93                 | 0.946       | 25       | 15                   | 45.45 | 11.64                | 0.96                 | 0.91                 | 1.000            | 91       | 23                   | 69.70  | 13.70                | 0.88                 | 0.93                 | 0.988       |
| <b>Ch10105</b> | 82       | 4                    | 44.44 | 3.18                 | 0.27                 | 0.27                 | 0.159       | 25       | 4                    | 44.44 | 2.33                 | 0.12                 | 0.12                 | 1.000            | 91       | 5                    | 55.56  | 3.27                 | 0.25                 | 0.26                 | 0.600       |
| <b>Ch10857</b> | 82       | 8                    | 47.06 | 5.38                 | 0.57                 | 0.69                 | 0.931       | 25       | 8                    | 47.06 | 6.06                 | 0.76                 | 0.73                 | 0.480            | 91       | 11                   | 64.71  | 6.70                 | 0.71                 | 0.76                 | 0.625       |
| <b>Ch13222</b> | 82       | 4                    | 66.67 | 2.50                 | 0.20                 | 0.20                 | 1.000       | 25       | 2                    | 33.33 | 1.96                 | 0.16                 | 0.21                 | 0.335            | 91       | 3                    | 50.00  | 2.20                 | 0.16                 | 0.18                 | 0.203       |
| <b>Ch18085</b> | 82       | 9                    | 64.29 | 7.30                 | 0.83                 | 0.83                 | 0.996       | 25       | 7                    | 50.00 | 6.24                 | 0.84                 | 0.81                 | 0.997            | 91       | 11                   | 78.57  | 7.69                 | 0.89                 | 0.84                 | 1.000       |
| <b>Ch2931</b>  | 82       | 12                   | 70.59 | 6.92                 | 0.73                 | 0.81                 | 0.795       | 25       | 9                    | 52.94 | 7.06                 | 0.80                 | 0.83                 | <b>0.008</b>     | 91       | 12                   | 70.59  | 6.85                 | 0.68                 | 0.79                 | 0.630       |
| <b>Ch4796</b>  | 82       | 15                   | 83.33 | 9.70                 | 0.89                 | 0.88                 | 0.166       | 25       | 10                   | 55.56 | 7.67                 | 0.88                 | 0.85                 | <b>&lt;0.001</b> | 91       | 14                   | 77.78  | 9.73                 | 0.91                 | 0.89                 | 1.000       |
| <b>Ch10441</b> | 82       | 10                   | 43.48 | 5.54                 | 0.48                 | 0.64                 | 0.010       | 25       | 7                    | 30.43 | 5.48                 | 0.68                 | 0.60                 | 0.973            | 91       | 11                   | 47.83  | 6.12                 | 0.67                 | 0.71                 | 0.827       |
| <b>Ch11230</b> | 82       | 8                    | 57.14 | 5.14                 | 0.67                 | 0.72                 | 0.978       | 25       | 6                    | 42.86 | 4.59                 | 0.68                 | 0.70                 | <b>0.004</b>     | 91       | 7                    | 50.00  | 4.79                 | 0.70                 | 0.68                 | 0.831       |
| <b>Ch11483</b> | 82       | 10                   | 66.67 | 4.60                 | 0.54                 | 0.54                 | 0.543       | 25       | 6                    | 40.00 | 4.71                 | 0.68                 | 0.58                 | 0.308            | 91       | 9                    | 60.00  | 4.82                 | 0.55                 | 0.55                 | 0.966       |
| <b>Ch17977</b> | 82       | 7                    | 46.67 | 4.71                 | 0.62                 | 0.61                 | 0.777       | 25       | 7                    | 46.67 | 5.08                 | 0.76                 | 0.63                 | 0.021            | 91       | 9                    | 60.00  | 5.22                 | 0.62                 | 0.62                 | 0.940       |
| <b>Ch19846</b> | 82       | 10                   | 83.33 | 7.23                 | 0.78                 | 0.82                 | 0.477       | 25       | 7                    | 58.33 | 6.13                 | 0.68                 | 0.79                 | 0.088            | 91       | 10                   | 83.33  | 6.88                 | 0.87                 | 0.80                 | 0.997       |
| <b>Ch24332</b> | 82       | 8                    | 80.00 | 4.72                 | 0.60                 | 0.65                 | 0.315       | 25       | 5                    | 50.00 | 3.57                 | 0.64                 | 0.57                 | 0.422            | 91       | 10                   | 100.00 | 4.87                 | 0.64                 | 0.67                 | 0.564       |
| <b>Ch25478</b> | 82       | 9                    | 56.25 | 3.70                 | 0.50                 | 0.58                 | 0.208       | 25       | 6                    | 37.50 | 4.21                 | 0.68                 | 0.62                 | <b>0.005</b>     | 91       | 9                    | 56.25  | 4.37                 | 0.63                 | 0.61                 | 0.970       |

| Locus          | RS97     |                      |       |                      |                      |                      |              |
|----------------|----------|----------------------|-------|----------------------|----------------------|----------------------|--------------|
|                | <i>n</i> | <i>N<sub>A</sub></i> | %     | <i>A<sub>R</sub></i> | <i>H<sub>O</sub></i> | <i>H<sub>E</sub></i> | <i>pHWE</i>  |
| <b>Ch126</b>   | 84       | 3                    | 42.86 | 2.60                 | 0.54                 | 0.53                 | 1.000        |
| <b>Ch520</b>   | 84       | 6                    | 75.00 | 3.88                 | 0.42                 | 0.48                 | 0.393        |
| <b>Ch623</b>   | 84       | 24                   | 72.73 | 13.54                | 0.93                 | 0.93                 | 0.786        |
| <b>Ch10105</b> | 84       | 4                    | 44.44 | 3.12                 | 0.26                 | 0.25                 | 0.759        |
| <b>Ch10857</b> | 84       | 10                   | 58.82 | 6.29                 | 0.73                 | 0.76                 | 0.065        |
| <b>Ch13222</b> | 84       | 3                    | 50.00 | 2.27                 | 0.23                 | 0.23                 | 0.311        |
| <b>Ch18085</b> | 84       | 10                   | 71.43 | 7.83                 | 0.86                 | 0.83                 | 1.000        |
| <b>Ch2931</b>  | 84       | 9                    | 52.94 | 6.44                 | 0.68                 | 0.79                 | 0.883        |
| <b>Ch4796</b>  | 84       | 15                   | 83.33 | 9.44                 | 0.83                 | 0.87                 | 0.398        |
| <b>Ch10441</b> | 84       | 10                   | 43.48 | 6.04                 | 0.60                 | 0.64                 | 0.517        |
| <b>Ch11230</b> | 84       | 8                    | 57.14 | 4.72                 | 0.71                 | 0.68                 | <b>0.002</b> |
| <b>Ch11483</b> | 84       | 8                    | 53.33 | 4.19                 | 0.55                 | 0.51                 | 0.740        |
| <b>Ch17977</b> | 84       | 8                    | 53.33 | 5.09                 | 0.57                 | 0.62                 | 0.377        |
| <b>Ch19846</b> | 84       | 10                   | 83.33 | 6.88                 | 0.82                 | 0.80                 | 0.870        |
| <b>Ch24332</b> | 84       | 7                    | 70.00 | 4.35                 | 0.68                 | 0.64                 | 1.000        |
| <b>Ch25478</b> | 84       | 8                    | 50.00 | 4.01                 | 0.60                 | 0.60                 | 0.111        |



**Table S2** Primer sequences and amplification conditions used to amplify 16 EST-linked microsatellite loci in *Pleuragramma antarctica*. Locus names, repeat motifs, primer pair sequences, fluorescent dye of forward primer, size range of fragments in base pairs, annealing temperature for single-locus amplification, and the respective multiplex reaction set are shown (adapted from Agostini *et al.*<sup>2</sup>).

| Locus                | Motif                                   | Primer sequences (5' - 3')                                                         | Dye   | Size range | T <sup>a</sup> (°C) | Locus set for multiplexing |
|----------------------|-----------------------------------------|------------------------------------------------------------------------------------|-------|------------|---------------------|----------------------------|
| Ch10105 <sup>b</sup> | (CTG) <sub>12</sub>                     | <b>F:</b> TGC CTT GGT TAG GAT TAA ACG T<br><b>R:</b> AGA AGT GCT CCA TCA AGT CCA   | 6-FAM | 96 - 131   | 57                  | 1                          |
| Ch10441 <sup>b</sup> | (CA) <sub>10</sub>                      | <b>F:</b> GTC CTT ACC TGG CAG TGC AGA<br><b>R:</b> GCA CAT CAG TCC AAA ATC GGT G   | PET   | 110 - 162  | 60                  | 2                          |
| Ch10857 <sup>b</sup> | (CA) <sub>9</sub>                       | <b>F:</b> GCT TAA ATC ACC ATG TGC CCA<br><b>R:</b> TGG ACA TGA ATG TAC CAA AAC G   | 6-FAM | 161 - 195  | 57                  | 1                          |
| Ch11230 <sup>b</sup> | (GA) <sub>7</sub>                       | <b>F:</b> ATC ACA CAG CTG ACT GGG GCT<br><b>R:</b> TGA GAC TCG TCC GCG AAT GGA     | NED   | 90 - 116   | 60                  | 2                          |
| Ch11483 <sup>b</sup> | (TAA) <sub>7</sub>                      | <b>F:</b> ATC AAA CTG AAC AGC CTG TGT<br><b>R:</b> TGG AGA ACA GGA ATG GAC AGA     | NED   | 124 - 168  | 57                  | 2                          |
| Ch126 <sup>c</sup>   | (AAT) <sub>7</sub>                      | <b>F:</b> CGG TTT TTA TGC ATG TTG CCA<br><b>R:</b> ACT GCT CAT TCA CAC TGG TTC     | NED   | 264 - 282  | 56                  | 1                          |
| Ch13222 <sup>b</sup> | (TTG) <sub>6</sub>                      | <b>F:</b> GTC CCA TGG TGA CTG ATA GGT<br><b>R:</b> ACG AGT CAA TGT AAC CGG AAG     | PET   | 82 - 98    | 57                  | 1                          |
| Ch17977 <sup>b</sup> | (GAT) <sub>8</sub>                      | <b>F:</b> TTG ACT GAC AGC TTG GGT GCA<br><b>R:</b> GAA TGA GCC ATG TTG AGC CC      | 6-FAM | 162 - 234  | 57                  | 2                          |
| Ch18085 <sup>b</sup> | (TGA) <sub>6</sub>                      | <b>F:</b> TTT AGG GGT GGC ACA TTG GAC<br><b>R:</b> ACA AAC CTT CTC CTT GTC TTC T   | VIC   | 98 - 137   | 57                  | 1                          |
| Ch19846 <sup>b</sup> | (GT) <sub>14</sub>                      | <b>F:</b> CGA CCT TTG AGA AAG GCG GCA<br><b>R:</b> CGA CGT GTA TCA CAA GGG TCA     | 6-FAM | 116 - 141  | 60                  | 2                          |
| Ch24332 <sup>b</sup> | (GCA) <sub>8</sub>                      | <b>F:</b> ATC GGT TGT CGT CCT CCA CAC<br><b>R:</b> GGC TGT TTC TGG ATC AGC GGT     | 6-FAM | 67 - 96    | 60                  | 2                          |
| Ch25478 <sup>b</sup> | (AC) <sub>8</sub>                       | <b>F:</b> ACA GTG TTG TCT TGG AGA GGT<br><b>R:</b> GGA GAG AAG TAC ATG AGG AGG A   | PET   | 143 - 175  | 57                  | 2                          |
| Ch2931 <sup>b</sup>  | (TCT) <sub>8</sub> t-(TTC) <sub>6</sub> | <b>F:</b> GGG CTT TCA GGA GCA TCG GGA<br><b>R:</b> ACT TGA ACC TGA CGT GGC AAC     | VIC   | 79 - 132   | 60                  | 2                          |
| Ch4796 <sup>b</sup>  | (GAT) <sub>8</sub>                      | <b>F:</b> ACA ATG GTT GGT GAG AGC TCC<br><b>R:</b> TGA GTT AAG CAG AAC AAG TGC     | VIC   | 156 - 208  | 57                  | 2                          |
| Ch520 <sup>b</sup>   | (TC) <sub>7</sub>                       | <b>F:</b> GGA ACA ACT TGA GCC AAG ACA<br><b>R:</b> CCA TAA AAG TGC ATC ATC GCT     | 6-FAM | 259 - 273  | 57                  | 1                          |
| Ch623 <sup>c</sup>   | (AAC) <sub>7</sub>                      | <b>F:</b> GCT GTT TGA TTC CCT CGT GAG G<br><b>R:</b> AAA AGT GGT CCT CCG CTG CAG T | PET   | 174 - 295  | 62                  | 1                          |

<sup>a</sup> Reported annealing temperature refers to single-locus PCR. Loci were amplified together in two multiplex reactions. Multiplex PCR reaction volume was 10 µL, containing 1x QIAGEN Multiplex PCR Master mix (HotStartTaq DNA Polymerase, Multiplex PCR Buffer, dNTP Mix; QIAGEN, Hilden, Germany), 0.2 µM primer mix and 100 ng of genomic DNA. The PCR amplification profile for all loci consisted of: (1) an initial activation step of 15 min at 95 °C; (2) 30 cycles of denaturation at 94 °C for 30 s, annealing at 57 °C for 90 s and extension at 72 °C for 60 s; and (3) a final extension of 30 min at 60 °C.

<sup>b</sup> Molecular Ecology Resources Primer Development Consortium *et al.*<sup>3</sup>

<sup>c</sup> Molecular Ecology Resources Primer Development Consortium *et al.*<sup>4</sup>

**Table S3** Analysis of Molecular Variance (AMOVA) among 19 populations of *Pleurogramma antarctica*, among six groups based on geographic origin, and among individuals within populations. Global results for fixation indices  $F_{ST}$ ,  $F_{SC}$ , and  $F_{CT}$  reported in upper table, results by locus reported in lower table.

| Source of variation                  | <i>df</i> | Proportion of variation | <i>P</i> -value   | Fixation Indices |         |
|--------------------------------------|-----------|-------------------------|-------------------|------------------|---------|
| Among groups                         | 5         | 0.16                    | 0.00218 ± 0.00050 | $F_{ST}$         | 0.00161 |
| Among populations within groups      | 13        | 0.00                    | 0.63050 ± 0.00429 | $F_{SC}$         | 0.00002 |
| Among individuals within populations | 2115      | 99.84                   | 0.00644 ± 0.00087 | $F_{CT}$         | 0.00159 |

  

| Locus   | $F_{SC}$ | <i>P</i> -value | $F_{ST}$ | <i>P</i> -value | $F_{SC}$ | <i>P</i> -value |
|---------|----------|-----------------|----------|-----------------|----------|-----------------|
| Ch126   | 0.00222  | 0.21436         | 0.00322  | 0.11287         | 0.00100  | 0.31168         |
| Ch520   | 0.00272  | 0.14782         | 0.00583  | 0.01525         | 0.00311  | 0.16238         |
| Ch623   | -0.00118 | 0.93178         | -0.00083 | 0.93248         | 0.00035  | 0.18139         |
| Ch10105 | 0.00264  | 0.16455         | 0.00529  | 0.02604         | 0.00266  | 0.18634         |
| Ch10857 | 0.00030  | 0.50772         | 0.00173  | 0.24465         | 0.00143  | 0.14436         |
| Ch13222 | 0.00253  | 0.21772         | 0.00267  | 0.19158         | 0.00014  | 0.44020         |
| Ch18085 | -0.00079 | 0.67248         | -0.00131 | 0.81139         | -0.00051 | 0.79634         |
| Ch2931  | 0.00256  | 0.18356         | 0.00231  | 0.16030         | -0.00025 | 0.57743         |
| Ch4796  | -0.00143 | 0.84980         | -0.00073 | 0.78752         | 0.00070  | 0.38485         |
| Ch10441 | 0.00197  | 0.24109         | 0.00197  | 0.19099         | 0.00000  | 0.42762         |
| Ch11483 | 0.00111  | 0.32614         | -0.00120 | 0.65604         | -0.00231 | 0.99822         |
| Ch17977 | -0.00251 | 0.87376         | -0.00239 | 0.93010         | 0.00012  | 0.46446         |
| Ch19846 | -0.00047 | 0.61356         | 0.01231  | 0.00000         | 0.01277  | 0.00059         |
| Ch24332 | -0.00156 | 0.71347         | -0.00190 | 0.84584         | -0.00034 | 0.64149         |
| Ch25478 | -0.00297 | 0.87149         | 0.00042  | 0.50792         | 0.00339  | 0.01970         |

**Table S4** Results of power analysis for the Fisher's and Chi-square tests by using POWSIM ver. 4.1<sup>5</sup>. To assess the statistical power of the 15 microsatellites to detect  $F_{ST}$  values  $\leq 0.01$ , observed sample sizes and allele frequencies were taken from the 19 sampling locations using 1000 replicates. Following the POWSIM manual, several combinations of  $N_e$  (1000 – 10000) and generations ( $t = 2 - 201$ ) were tested to account for the variability in  $N_e$  estimation. Power is given in % for Fisher's and Chi-square tests.

| $N_e$        | $F_{ST} = 0.01$ |        |            | $F_{ST} = 0.005$ |        |            | $F_{ST} = 0.0025$ |        |            | $F_{ST} = 0.001$ |        |            |
|--------------|-----------------|--------|------------|------------------|--------|------------|-------------------|--------|------------|------------------|--------|------------|
|              | $t$             | Fisher | Chi-square | $t$              | Fisher | Chi-square | $t$               | Fisher | Chi-square | $t$              | Fisher | Chi-square |
| <b>1000</b>  | <i>20</i>       | 100    | 100        | <i>10</i>        | 100    | 100        | <i>5</i>          | 100    | 100        | <i>2</i>         | 96.2   | 95.3       |
| <b>5000</b>  | <i>100</i>      | 100    | 100        | <i>50</i>        | 100    | 100        | <i>25</i>         | 100    | 100        | <i>10</i>        | 96.4   | 94.1       |
| <b>10000</b> | <i>201</i>      | 100    | 100        | <i>100</i>       | 100    | 100        | <i>50</i>         | 100    | 100        | <i>20</i>        | 97.4   | 94.6       |

**Table S5** Comparison of tests of genetic differentiation among *Pleurogramma antarctica* samples from the Antarctic Peninsula included in the analysis of Agostini *et al.*<sup>2</sup>. Pairwise  $F_{ST}$  estimates (above the diagonal) and corresponding  $P$ -values (below the diagonal) are shown. Values in bold were significant after correction for multiple tests as implemented in SGoF+. Comparisons within the same geographic region are delineated with dotted lines. **a** Original pairwise  $F_{ST}$  analysis adapted from Table 3 in Agostini *et al.*<sup>2</sup> (threshold for significance with 36 comparisons  $P = 0.0180$ ). **b** Pairwise  $F_{ST}$  analysis of samples from Agostini *et al.*<sup>2</sup> using 15 loci after the removal of locus Ch11230 (threshold for significance with 36 comparisons  $P = 0.0160$ ). Values shaded in light gray indicate gains of significance compared to the original analysis<sup>2</sup>. Values shaded in dark gray indicate losses of significance compared to the original analysis<sup>2</sup>. Numbers in parentheses adjacent to group names indicate sample size ( $n$ ). Sampling location acronyms are as in Table 1.

**a**

| Original Analysis | Western Antarctic Peninsula |               |                 |           |                 | Northern Antarctic Peninsula |               |               | Larsen Bay    |
|-------------------|-----------------------------|---------------|-----------------|-----------|-----------------|------------------------------|---------------|---------------|---------------|
|                   | CI10 (60)                   | MB01 (28)     | MB02 (49)       | MB10 (60) | MB11 (83)       | JI07 (34)                    | JI10 (148)    | JI12 (54)     | LB07 (46)     |
| CI10              | -                           | -0.0011       | -0.0008         | 0.0007    | -0.0001         | -0.0009                      | <b>0.0065</b> | <b>0.0102</b> | 0.0061        |
| MB01              | 0.7027                      | -             | -0.0015         | -0.0026   | -0.0015         | 0.0017                       | 0.0057        | <b>0.0086</b> | 0.0063        |
| MB02              | 0.6216                      | 0.7207        | -               | 0.0005    | 0.0009          | 0.0007                       | <b>0.0037</b> | <b>0.0093</b> | 0.0035        |
| MB10              | 0.3333                      | 0.8018        | 0.4054          | -         | 0.0004          | -0.0028                      | 0.0017        | 0.0062        | 0.0029        |
| MB11              | 0.5496                      | 0.6757        | 0.2342          | 0.2793    | -               | -0.0004                      | <b>0.0041</b> | <b>0.0060</b> | <b>0.0089</b> |
| JI07              | 0.7838                      | 0.2973        | 0.3874          | 0.8559    | 0.5315          | -                            | -0.0015       | 0.0008        | 0.0001        |
| JI10              | < <b>0.0001</b>             | 0.0180        | < <b>0.0001</b> | 0.0541    | < <b>0.0001</b> | 0.8108                       | -             | 0.0020        | 0.0020        |
| JI12              | < <b>0.0001</b>             | <b>0.0090</b> | < <b>0.0001</b> | 0.0270    | < <b>0.0001</b> | 0.3874                       | 0.0991        | -             | <b>0.0057</b> |
| LB07              | 0.0180                      | 0.0991        | 0.0811          | 0.0451    | < <b>0.0001</b> | 0.4955                       | 0.0991        | <b>0.0090</b> | -             |

**b**

| 15 loci w/o Ch11230 | Western Antarctic Peninsula |           |               |               |                 | Northern Antarctic Peninsula |               |               | Larsen Bay    |
|---------------------|-----------------------------|-----------|---------------|---------------|-----------------|------------------------------|---------------|---------------|---------------|
|                     | CI10 (60)                   | MB01 (28) | MB02 (49)     | MB10 (60)     | MB11 (83)       | JI07 (34)                    | JI10 (148)    | JI12 (54)     | LB07 (46)     |
| CI10                | -                           | 0.0021    | 0.0003        | 0.0003        | -0.0010         | -0.0006                      | <b>0.0068</b> | <b>0.0111</b> | <b>0.0057</b> |
| MB01                | 0.2793                      | -         | 0.0019        | 0.0002        | 0.0004          | -0.0001                      | 0.0041        | 0.0059        | 0.0042        |
| MB02                | 0.4454                      | 0.2315    | -             | 0.0007        | 0.0002          | 0.0012                       | <b>0.0035</b> | <b>0.0084</b> | 0.0041        |
| MB10                | 0.4566                      | 0.4512    | 0.3341        | -             | 0.0009          | -0.0020                      | 0.0027        | <b>0.0085</b> | 0.0025        |
| MB11                | 0.7577                      | 0.3860    | 0.3902        | 0.2479        | -               | 0.0002                       | <b>0.0051</b> | <b>0.0082</b> | <b>0.0083</b> |
| JI07                | 0.6186                      | 0.4475    | 0.2680        | 0.8035        | 0.3916          | -                            | -0.0010       | 0.0019        | 0.0008        |
| JI10                | < <b>0.0001</b>             | 0.0556    | <b>0.0160</b> | 0.0234        | < <b>0.0001</b> | 0.7230                       | -             | 0.0025        | 0.0019        |
| JI12                | < <b>0.0001</b>             | 0.0444    | <b>0.0006</b> | <b>0.0003</b> | <b>0.0001</b>   | 0.2279                       | 0.0514        | -             | <b>0.0060</b> |
| LB07                | <b>0.0160</b>               | 0.1147    | 0.0441        | 0.1259        | <b>0.0002</b>   | 0.3588                       | 0.1176        | <b>0.0120</b> | -             |

**Table S6** Standard length (SL) analysis. **a** SL-derived groupings independent of sampling location. **b – g** Pairwise  $F_{ST}$  estimates (above the diagonal) and corresponding  $P$ -values (below the diagonal) are shown. Values in bold were significant after correction for multiple tests as implemented in SGoF+<sup>1</sup>. Group numbers correspond to respective groupings in **a**. Group SL range (cm) in parentheses to the left of each matrix. Sample size ( $n$ ) in parentheses above each matrix.

**a**

| <u>SL Grouping 1</u> |         |     |
|----------------------|---------|-----|
| Groups               | cm      | $n$ |
| 1                    | 3 - 4   | 3   |
| 2                    | 4 - 5   | 46  |
| 3                    | 5 - 6   | 14  |
| 4                    | 6 - 7   | 16  |
| 5                    | 7 - 8   | 5   |
| 6                    | 8 - 9   | 14  |
| 7                    | 9 - 10  | 56  |
| 8                    | 10 - 11 | 83  |
| 9                    | 11 - 12 | 81  |
| 10                   | 12 - 13 | 58  |
| 11                   | 13 - 14 | 30  |
| 12                   | 14 - 15 | 45  |
| 13                   | 15 - 16 | 78  |
| 14                   | 16 - 17 | 72  |
| 15                   | 17 - 18 | 32  |
| 16                   | 18 - 19 | 23  |
| 17                   | 19 - 20 | 7   |
| 18                   | 20 - 21 | 4   |
| 19                   | 21 - 22 | 4   |

| <u>SL Grouping 2</u> |         |     |
|----------------------|---------|-----|
| Groups               | cm      | $n$ |
| 1                    | 3 - 5   | 49  |
| 2                    | 5 - 7   | 30  |
| 3                    | 7 - 9   | 19  |
| 4                    | 9 - 11  | 139 |
| 5                    | 11 - 13 | 139 |
| 6                    | 13 - 15 | 75  |
| 7                    | 15 - 17 | 150 |
| 8                    | 17 - 19 | 55  |
| 9                    | 19 - 21 | 11  |
| 10                   | 21 - 23 | 4   |

| <u>SL Grouping 3</u> |         |     |
|----------------------|---------|-----|
| Groups               | cm      | $n$ |
| 1                    | 3 - 6   | 63  |
| 2                    | 6 - 9   | 35  |
| 3                    | 9 - 12  | 220 |
| 4                    | 12 - 15 | 133 |
| 5                    | 15 - 18 | 182 |
| 6                    | 18 - 21 | 34  |
| 7                    | 21 - 24 | 4   |

| <u>SL Grouping 4</u> |         |     |
|----------------------|---------|-----|
| Groups               | cm      | $n$ |
| 1                    | 3 - 7   | 79  |
| 2                    | 7 - 11  | 158 |
| 3                    | 11 - 15 | 214 |
| 4                    | 15 - 19 | 205 |
| 5                    | 19 - 23 | 15  |

| <u>SL Grouping 5</u> |         |     |
|----------------------|---------|-----|
| Groups               | cm      | $n$ |
| 1                    | 3 - 8   | 84  |
| 2                    | 8 - 13  | 292 |
| 3                    | 13 - 18 | 257 |
| 4                    | 18 - 23 | 38  |

| <u>SL Grouping 6</u> |         |     |
|----------------------|---------|-----|
| Groups               | cm      | $n$ |
| 1                    | 3 - 9   | 98  |
| 2                    | 9 - 15  | 353 |
| 3                    | 15 - 22 | 220 |

**b SL Grouping 1**

| (cm) \ (n)   | 1 (3)           | 2 (46) | 3 (14) | 4 (16)          | 5 (5)   | 6 (14)  | 7 (56)  | 8 (83)  | 9 (81)        | 10 (58) | 11 (30) | 12 (45) | 13 (78) | 14 (72) | 15 (32) | 16 (23)       | 17 (7)  | 18 (4)  | 19 (4)  |
|--------------|-----------------|--------|--------|-----------------|---------|---------|---------|---------|---------------|---------|---------|---------|---------|---------|---------|---------------|---------|---------|---------|
| 1 (3 - 4)    | -               | 0.0486 | 0.0163 | 0.0515          | 0.0097  | 0.0454  | 0.0509  | 0.0575  | <b>0.0457</b> | 0.0571  | 0.0407  | 0.0563  | 0.0395  | 0.0472  | 0.0485  | 0.0541        | 0.0559  | -0.0081 | 0.0330  |
| 2 (4 - 5)    | 0.0180          | -      | 0.0039 | 0.0047          | -0.0016 | -0.0016 | 0.0031  | 0.0018  | 0.0012        | 0.0042  | 0.0003  | 0.0004  | 0.0020  | 0.0012  | 0.0019  | 0.0025        | 0.0016  | 0.0083  | -0.0059 |
| 3 (5 - 6)    | 0.3153          | 0.2613 | -      | 0.0070          | -0.0037 | 0.0081  | 0.0120  | 0.0047  | 0.0023        | 0.0070  | -0.0028 | 0.0092  | 0.0042  | 0.0035  | -0.0007 | -0.0015       | 0.0196  | -0.0057 | -0.0101 |
| 4 (6 - 7)    | 0.0631          | 0.1351 | 0.1892 | -               | -0.0240 | 0.0012  | 0.0033  | -0.0012 | -0.0031       | -0.0013 | -0.0020 | 0.0025  | -0.0008 | 0.0031  | -0.0031 | <b>0.0053</b> | 0.0270  | 0.0107  | -0.0103 |
| 5 (7 - 8)    | 0.6306          | 0.5405 | 0.5405 | 0.9550          | -       | -0.0185 | -0.0173 | -0.0115 | -0.0134       | -0.0200 | -0.0094 | -0.0095 | -0.0104 | -0.0129 | -0.0113 | -0.0040       | 0.0068  | -0.0357 | -0.0241 |
| 6 (8 - 9)    | 0.1261          | 0.7387 | 0.1351 | 0.3694          | 0.9730  | -       | 0.0024  | -0.0055 | -0.0029       | -0.0003 | -0.0011 | -0.0034 | -0.0046 | -0.0006 | -0.0036 | -0.0007       | -0.0113 | -0.0153 | -0.0196 |
| 7 (9 - 10)   | 0.0541          | 0.1081 | 0.0180 | 0.2793          | 0.9640  | 0.3514  | -       | 0.0030  | 0.0016        | -0.0001 | 0.0053  | 0.0024  | 0.0024  | 0.0020  | -0.0002 | 0.0064        | 0.0048  | 0.0028  | -0.0008 |
| 8 (10 - 11)  | 0.0180          | 0.1532 | 0.1351 | 0.6667          | 0.8919  | 0.9369  | 0.0541  | -       | -0.0019       | -0.0003 | -0.0008 | -0.0013 | -0.0013 | 0.0005  | -0.0032 | -0.0012       | 0.0058  | 0.0042  | -0.0093 |
| 9 (11 - 12)  | 0.0180          | 0.2072 | 0.2613 | 0.8378          | 0.9279  | 0.7568  | 0.1261  | 0.9369  | -             | -0.0002 | -0.0010 | -0.0014 | -0.0021 | -0.0004 | -0.0013 | -0.0009       | 0.0033  | 0.0020  | -0.0120 |
| 10 (12 - 13) | < <b>0.0001</b> | 0.0090 | 0.0901 | 0.6667          | 0.9820  | 0.5045  | 0.5676  | 0.5766  | 0.6126        | -       | 0.0022  | 0.0021  | 0.0023  | 0.0004  | 0.0003  | 0.0028        | 0.0050  | 0.0061  | -0.0112 |
| 11 (13 - 14) | 0.0631          | 0.5045 | 0.7658 | 0.6487          | 0.8649  | 0.6487  | 0.0541  | 0.5946  | 0.6306        | 0.2072  | -       | 0.0015  | 0.0001  | 0.0037  | 0.0004  | -0.0048       | 0.0119  | 0.0063  | -0.0133 |
| 12 (14 - 15) | 0.0360          | 0.4955 | 0.0451 | 0.3243          | 0.8018  | 0.8108  | 0.2072  | 0.7568  | 0.7928        | 0.1622  | 0.3153  | -       | -0.0013 | 0.0026  | -0.0012 | 0.0004        | 0.0027  | 0.0104  | -0.0132 |
| 13 (15 - 16) | 0.0541          | 0.1261 | 0.1351 | 0.5676          | 0.8559  | 0.8829  | 0.0541  | 0.8288  | 0.9550        | 0.1081  | 0.4414  | 0.7748  | -       | 0.0004  | -0.0010 | 0.0003        | 0.0023  | 0.0019  | -0.0068 |
| 14 (16 - 17) | 0.0180          | 0.3063 | 0.2793 | 0.2162          | 0.9460  | 0.5946  | 0.1441  | 0.2342  | 0.6126        | 0.3964  | 0.0901  | 0.1081  | 0.3964  | -       | 0.0018  | 0.0016        | 0.0047  | 0.0077  | 0.0012  |
| 15 (17 - 18) | 0.0270          | 0.3243 | 0.5946 | 0.7478          | 0.8919  | 0.8378  | 0.5496  | 0.9279  | 0.7658        | 0.4505  | 0.4505  | 0.6577  | 0.7748  | 0.3514  | -       | 0.0027        | 0.0097  | 0.0050  | -0.0152 |
| 16 (18 - 19) | 0.0270          | 0.2252 | 0.6036 | 0.1441          | 0.7297  | 0.5676  | 0.0631  | 0.5766  | 0.5676        | 0.1982  | 0.9369  | 0.3874  | 0.4505  | 0.2613  | 0.2523  | -             | 0.0106  | 0.0174  | -0.0139 |
| 17 (19 - 20) | 0.1441          | 0.5315 | 0.0901 | < <b>0.0001</b> | 0.4324  | 0.9460  | 0.3063  | 0.2703  | 0.3694        | 0.3153  | 0.1712  | 0.4505  | 0.3964  | 0.3423  | 0.1802  | 0.1351        | -       | 0.0040  | -0.0040 |
| 18 (20 - 21) | 0.7568          | 0.3333 | 0.6577 | 0.2162          | 0.9550  | 0.8739  | 0.4865  | 0.4505  | 0.6216        | 0.3604  | 0.3243  | 0.2252  | 0.5586  | 0.3964  | 0.3694  | 0.1261        | 0.5586  | -       | -0.0083 |
| 19 (21 - 22) | 0.4324          | 0.7478 | 0.7838 | 0.7928          | 0.9279  | 0.9640  | 0.6396  | 0.7387  | 0.7658        | 0.7838  | 0.8829  | 0.9099  | 0.6847  | 0.4865  | 0.8829  | 0.8108        | 0.7478  | 0.6126  | -       |

**c SL Grouping 2**

| (cm) \ (n)   | 1 (49) | 2 (30) | 3 (19) | 4 (139) | 5 (139) | 6 (75)  | 7 (150) | 8 (55)  | 9 (11)  | 10 (4)  |
|--------------|--------|--------|--------|---------|---------|---------|---------|---------|---------|---------|
| 1 (3 - 5)    | -      | 0.0016 | 0.0016 | 0.0019  | 0.0025  | 0.0002  | 0.0012  | 0.0016  | 0.0024  | -0.0061 |
| 2 (5 - 7)    | 0.2523 | -      | 0.0014 | 0.0013  | -0.0011 | 0.0003  | 0.0005  | -0.0028 | 0.0134  | -0.0118 |
| 3 (7 - 9)    | 0.3874 | 0.3694 | -      | -0.0025 | -0.0020 | -0.0010 | -0.0014 | -0.0011 | -0.0089 | -0.0160 |
| 4 (9 - 11)   | 0.1982 | 0.2793 | 0.8649 | -       | -0.0011 | -0.0003 | -0.0002 | -0.0018 | 0.0029  | -0.0065 |
| 5 (11 - 13)  | 0.0541 | 0.7117 | 0.7297 | 0.9460  | -       | -0.0002 | -0.0002 | -0.0007 | 0.0029  | -0.0115 |
| 6 (13 - 15)  | 0.4505 | 0.4505 | 0.6487 | 0.6306  | 0.5856  | -       | 0.0006  | -0.0020 | 0.0062  | -0.0135 |
| 7 (15 - 17)  | 0.2252 | 0.3964 | 0.6667 | 0.6216  | 0.6306  | 0.3243  | -       | -0.0001 | 0.0031  | -0.0030 |
| 8 (17 - 19)  | 0.2252 | 0.8919 | 0.5676 | 0.9369  | 0.6396  | 0.9189  | 0.6487  | -       | 0.0083  | -0.0152 |
| 9 (19 - 21)  | 0.4595 | 0.0721 | 0.9189 | 0.2973  | 0.3243  | 0.1171  | 0.3063  | 0.0991  | -       | -0.0051 |
| 10 (21 - 23) | 0.7838 | 0.8198 | 0.9820 | 0.6757  | 0.8018  | 0.9009  | 0.5496  | 0.9099  | 0.6036  | -       |

**d SL Grouping 3**

| (cm) \ (n)  | 1 (63) | 2 (35) | 3 (220) | 4 (133) | 5 (182) | 6 (34)  | 7 (4)   |
|-------------|--------|--------|---------|---------|---------|---------|---------|
| 1 (3 - 6)   | -      | 0.0044 | 0.0022  | 0.0020  | 0.0012  | -0.0002 | -0.0072 |
| 2 (6 - 9)   | 0.0451 | -      | -0.0010 | -0.0008 | -0.0001 | 0.0015  | -0.0124 |
| 3 (9 - 12)  | 0.0270 | 0.8108 | -       | -0.0009 | -0.0007 | -0.0012 | -0.0082 |
| 4 (12 - 15) | 0.0901 | 0.6847 | 0.9369  | -       | 0.0002  | -0.0013 | -0.0129 |
| 5 (15 - 18) | 0.1892 | 0.6036 | 0.9460  | 0.2973  | -       | -0.0005 | -0.0051 |
| 6 (18 - 21) | 0.5856 | 0.3243 | 0.7838  | 0.6757  | 0.5946  | -       | -0.0135 |
| 7 (21 - 24) | 0.6757 | 0.8739 | 0.7207  | 0.9279  | 0.6216  | 0.8649  | -       |

**e SL Grouping 4**

| (cm) \ (n)  | 1 (79) | 2 (158) | 3 (214) | 4 (205) | 5 (15)  |
|-------------|--------|---------|---------|---------|---------|
| 1 (3 - 7)   | -      | 0.0015  | 0.0004  | 0.0003  | 0.0033  |
| 2 (7 - 11)  | 0.1171 | -       | -0.0006 | -0.0004 | -0.0001 |
| 3 (11 - 15) | 0.3423 | 0.8469  | -       | -0.0002 | 0.0005  |
| 4 (15 - 19) | 0.4595 | 0.7478  | 0.7748  | -       | 0.0025  |
| 5 (19 - 23) | 0.2613 | 0.5315  | 0.3784  | 0.2883  | -       |

**f SL Grouping 5**

| (cm) \ (n)  | 1 (84) | 2 (292) | 3 (257) | 4 (38)  |
|-------------|--------|---------|---------|---------|
| 1 (3 - 8)   | -      | 0.0007  | -0.0002 | 0.0008  |
| 2 (8 - 13)  | 0.1802 | -       | -0.0002 | -0.0007 |
| 3 (13 - 18) | 0.5225 | 0.7658  | -       | -0.0004 |
| 4 (18 - 23) | 0.4144 | 0.6487  | 0.5496  | -       |

**g SL Grouping 6**

| (cm) \ (n)  | 1 (98) | 2 (353) | 3 (220) |
|-------------|--------|---------|---------|
| 1 (3 - 9)   | -      | 0.0002  | -0.0003 |
| 2 (9 - 15)  | 0.3964 | -       | -0.0003 |
| 3 (15 - 22) | 0.7838 | 0.7748  | -       |

**Table S7** Genetic differentiation among *Pleuragramma antarctica* samples including small and large size clusters from Joinville Island 2010. Pairwise  $F_{ST}$  estimates (above the diagonal) and corresponding  $P$ -values (below the diagonal) are shown. Values in bold were significant after correction for multiple tests as implemented in SGoF+<sup>1</sup> (threshold for significance with 190 comparisons  $P = 0.0453$ ). Comparisons within the same geographic region are delineated with dotted lines. Values shaded in light gray indicate gains of significance compared to the original analysis<sup>2</sup>. Values shaded in dark gray indicate losses of significance compared to the original analysis<sup>2</sup>. Numbers in parentheses adjacent to group names indicate sample size ( $n$ ). Sampling location acronyms are as in Table 1. JI10S, Joinville Island 2010 small cluster; JI10L, Joinville Island 2010 large cluster; SOI, South Orkney Islands.

|              | Western Antarctic Peninsula (WAP) |               |               |               |               | Northern Antarctic Peninsula (NAP) |               |               |               |            | SOI           | Larsen Bay (LB) |               | Weddell Sea (WS) |               |               |           |           | Ross Sea (RS) |               |
|--------------|-----------------------------------|---------------|---------------|---------------|---------------|------------------------------------|---------------|---------------|---------------|------------|---------------|-----------------|---------------|------------------|---------------|---------------|-----------|-----------|---------------|---------------|
|              | CI10 (60)                         | MB01 (28)     | MB02 (49)     | MB10 (60)     | MB11 (83)     | JI07 (34)                          | JI10S (68)    | JI10L (72)    | JI12 (54)     | SSI96 (14) | SOI11 (47)    | LB07 (46)       | LB11 (52)     | FT14 (50)        | HB89 (19)     | HB91 (41)     | HB14 (82) | AB14 (25) | RS96 (91)     | RS97 (84)     |
| <b>CI10</b>  | -                                 | -0.0008       | -0.0002       | 0.0007        | -0.0008       | -0.0033                            | <b>0.0061</b> | <b>0.0048</b> | <b>0.0043</b> | -0.0044    | <b>0.0100</b> | <b>0.0054</b>   | 0.0021        | 0.0002           | 0.0067        | 0.0016        | 0.0001    | -0.0012   | <b>0.0049</b> | 0.0024        |
| <b>MB01</b>  | 0.6810                            | -             | -0.0004       | -0.0022       | -0.0016       | 0.0006                             | <b>0.0070</b> | <b>0.0043</b> | 0.0047        | 0.0016     | <b>0.0125</b> | 0.0057          | 0.0057        | 0.0007           | 0.0051        | 0.0037        | 0.0015    | 0.0008    | 0.0043        | 0.0042        |
| <b>MB02</b>  | 0.5787                            | 0.5126        | -             | 0.0015        | 0.0010        | -0.0013                            | <b>0.0041</b> | 0.0016        | 0.0039        | -0.0041    | <b>0.0103</b> | 0.0021          | 0.0006        | 0.0010           | 0.0062        | 0.0004        | -0.0003   | -0.0036   | 0.0023        | <b>0.0043</b> |
| <b>MB10</b>  | 0.3758                            | 0.7993        | 0.2069        | -             | 0.0009        | -0.0037                            | <b>0.0032</b> | 0.0006        | <b>0.0037</b> | -0.0012    | <b>0.0091</b> | 0.0027          | -0.0005       | -0.0000          | 0.0047        | 0.0008        | -0.0011   | -0.0021   | 0.0002        | 0.0010        |
| <b>MB11</b>  | 0.7213                            | 0.7356        | 0.2443        | 0.2427        | -             | -0.0008                            | <b>0.0061</b> | <b>0.0047</b> | <b>0.0043</b> | 0.0012     | <b>0.0096</b> | <b>0.0094</b>   | <b>0.0046</b> | 0.0008           | 0.0060        | 0.0030        | 0.0018    | -0.0001   | <b>0.0041</b> | <b>0.0025</b> |
| <b>JI07</b>  | 0.9567                            | 0.4147        | 0.6655        | 0.9617        | 0.6194        | -                                  | 0.0031        | -0.0032       | 0.0010        | -0.0084    | <b>0.0059</b> | 0.0009          | -0.0034       | -0.0034          | 0.0054        | 0.0002        | -0.0027   | -0.0053   | -0.0018       | -0.0026       |
| <b>JI10S</b> | <b>0.0041</b>                     | <b>0.0156</b> | <b>0.0284</b> | <b>0.0399</b> | <b>0.0005</b> | 0.1056                             | -             | <b>0.0040</b> | <b>0.0034</b> | 0.0013     | <b>0.0045</b> | 0.0055          | <b>0.0037</b> | 0.0019           | -0.0004       | 0.0005        | 0.0021    | 0.0038    | 0.0001        | <b>0.0044</b> |
| <b>JI10L</b> | <b>0.0096</b>                     | <b>0.0691</b> | 0.1819        | 0.3252        | <b>0.0020</b> | 0.9572                             | <b>0.0098</b> | -             | 0.0024        | -0.0042    | <b>0.0042</b> | 0.0003          | -0.0018       | 0.0002           | 0.0049        | 0.0032        | -0.0008   | -0.0018   | -0.0000       | 0.0019        |
| <b>JI12</b>  | <b>0.0358</b>                     | 0.0902        | 0.0527        | <b>0.0388</b> | <b>0.0115</b> | 0.3543                             | <b>0.0514</b> | 0.1143        | -             | 0.0020     | 0.0013        | 0.0039          | 0.0027        | -0.0006          | 0.0053        | -0.0015       | 0.0015    | 0.0014    | 0.0020        | 0.0020        |
| <b>SSI96</b> | 0.8949                            | 0.3972        | 0.8144        | 0.5788        | 0.3643        | 0.9734                             | 0.4086        | 0.8656        | 0.3729        | -          | 0.0010        | 0.0012          | -0.0057       | -0.0062          | 0.0034        | -0.0018       | -0.0050   | -0.0072   | -0.0016       | -0.0016       |
| <b>SOI11</b> | <b>0.0006</b>                     | <b>0.0016</b> | <b>0.0009</b> | <b>0.0006</b> | <b>0.0001</b> | <b>0.0383</b>                      | <b>0.0265</b> | <b>0.0312</b> | 0.3132        | 0.4789     | -             | <b>0.0058</b>   | 0.0039        | 0.0003           | 0.0066        | -0.0001       | 0.0037    | 0.0049    | <b>0.0066</b> | 0.0031        |
| <b>LB07</b>  | <b>0.0188</b>                     | 0.0518        | 0.1708        | 0.0958        | <b>0.0001</b> | 0.3593                             | 0.0095        | 0.4401        | 0.0598        | 0.4017     | <b>0.0212</b> | -               | 0.0020        | 0.0020           | 0.0047        | <b>0.0056</b> | 0.0004    | 0.0004    | <b>0.0033</b> | 0.0033        |
| <b>LB11</b>  | 0.1806                            | 0.0453        | 0.3619        | 0.5866        | <b>0.0088</b> | 0.9430                             | <b>0.0361</b> | 0.8908        | 0.1145        | 0.9241     | 0.0650        | 0.1872          | -             | -0.0012          | <b>0.0098</b> | -0.0012       | -0.0008   | -0.0035   | 0.0016        | 0.0013        |
| <b>FT14</b>  | 0.5172                            | 0.4127        | 0.3118        | 0.4773        | 0.2877        | 0.9348                             | 0.1716        | 0.4705        | 0.6511        | 0.9403     | 0.4792        | 0.1909          | 0.7452        | -                | 0.0044        | -0.0012       | -0.0015   | -0.0037   | -0.0009       | -0.0013       |
| <b>HB89</b>  | 0.0826                            | 0.1752        | 0.0647        | 0.1036        | 0.0501        | 0.1201                             | 0.5773        | 0.1046        | 0.1347        | 0.3473     | 0.0970        | 0.1393          | <b>0.0140</b> | 0.1607           | -             | 0.0047        | 0.0024    | 0.0066    | 0.0017        | 0.0057        |
| <b>HB91</b>  | 0.2849                            | 0.1499        | 0.4115        | 0.3282        | 0.0648        | 0.4695                             | 0.4343        | 0.0736        | 0.7977        | 0.6767     | 0.5613        | <b>0.0245</b>   | 0.7272        | 0.7308           | 0.1513        | -             | -0.0006   | -0.0031   | 0.0015        | 0.0007        |
| <b>HB14</b>  | 0.5501                            | 0.3427        | 0.6011        | 0.8075        | 0.1110        | 0.9388                             | 0.1104        | 0.7651        | 0.2477        | 0.9273     | 0.0570        | 0.4541          | 0.7321        | 0.8674           | 0.3111        | 0.6730        | -         | -0.0051   | 0.0011        | -0.0009       |
| <b>AB14</b>  | 0.6987                            | 0.3851        | 0.8802        | 0.7514        | 0.4561        | 0.9474                             | 0.1031        | 0.7432        | 0.3292        | 0.9054     | 0.0926        | 0.4136          | 0.9021        | 0.9088           | 0.0950        | 0.8464        | 0.9948    | -         | 0.0011        | -0.0004       |
| <b>RS96</b>  | <b>0.0038</b>                     | 0.0557        | 0.0871        | 0.4265        | <b>0.0021</b> | 0.8266                             | 0.4733        | 0.5089        | 0.1134        | 0.6513     | <b>0.0019</b> | <b>0.0387</b>   | 0.1593        | 0.7272           | 0.3082        | 0.2056        | 0.2117    | 0.3128    | -             | <b>0.0024</b> |
| <b>RS97</b>  | 0.0946                            | 0.0675        | <b>0.0183</b> | 0.2533        | <b>0.0392</b> | 0.9226                             | <b>0.0061</b> | 0.1035        | 0.1422        | 0.6717     | 0.0702        | 0.0508          | 0.2248        | 0.8198           | 0.0698        | 0.3866        | 0.8077    | 0.5514    | <b>0.0391</b> | -             |

**Table S8** Genetic differentiation among *Pleuragramma antarctica* sampling locations from the eastern Weddell Sea. Pairwise  $F_{ST}$  estimates (above the diagonal) and corresponding  $P$ -values (below the diagonal) are shown. Numbers in parentheses adjacent to group names indicate sample size ( $n$ ). FT, Filchner Trough; CL, Coats Land; HB, Halley Bay; AB, Atka Bay.

|                | <b>west FT (23)</b> | <b>east FT (27)</b> | <b>CL (29)</b> | <b>HB (52)</b> | <b>AB (25)</b> |
|----------------|---------------------|---------------------|----------------|----------------|----------------|
| <b>west FT</b> | -                   | 0.0027              | -0.0053        | -0.0019        | -0.0019        |
| <b>east FT</b> | 0.2798              | -                   | -0.0015        | 0.0007         | -0.0039        |
| <b>CL</b>      | 0.9602              | 0.7372              | -              | -0.0028        | -0.0060        |
| <b>HB</b>      | 0.7556              | 0.4143              | 0.9051         | -              | -0.0062        |
| <b>AB</b>      | 0.6489              | 0.8309              | 0.9830         | 0.9954         | -              |



**a**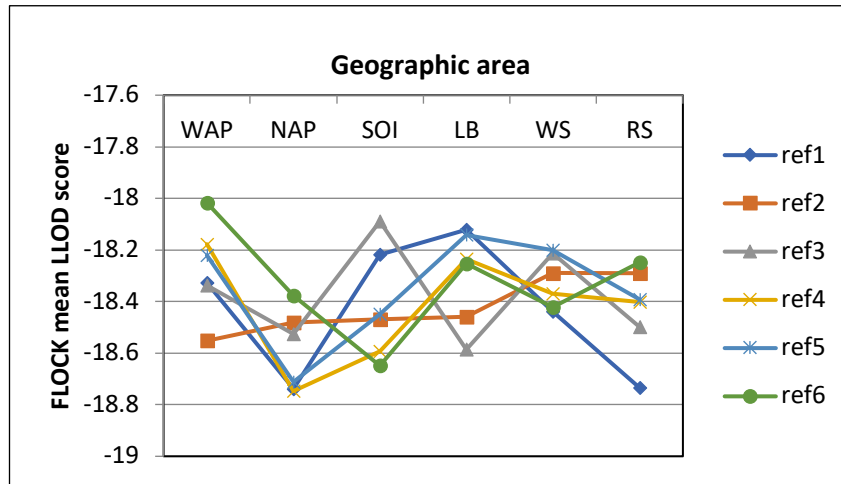**b**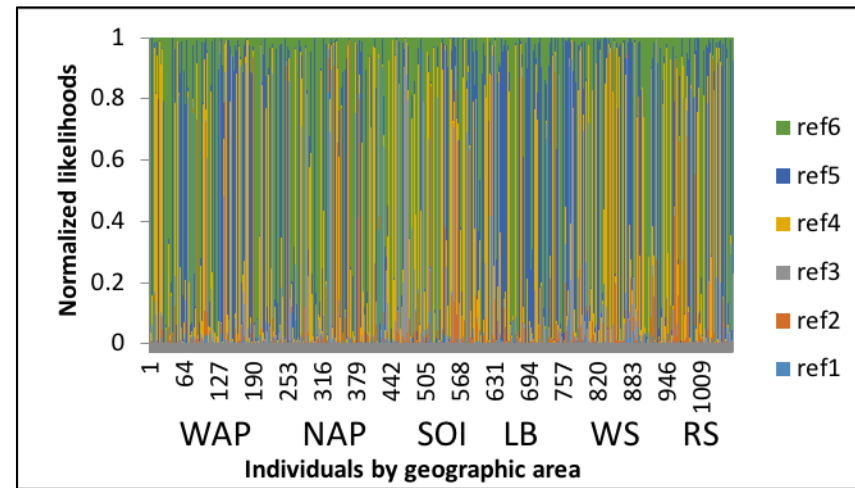

**Figure S1** FLOCK clustering results for *Pleuragramma antarctica* populations. **a** Mean LLOD scores are ordered by geographic area. **b** Normalized likelihoods, individuals are ordered by geographic area. ref, reference  $k$  group cluster (user-define  $k = 6$ ). Initial partition mode by random choice of samples. Number of iterations (re-allocations) per run = 20. Number of runs per parameter  $k = 50$ . Log likelihood difference (LLOD) threshold = 0 (allocation occurs as soon as there is a highest log-likelihood difference between populations)<sup>6</sup>. Group acronyms are as in Table 1.

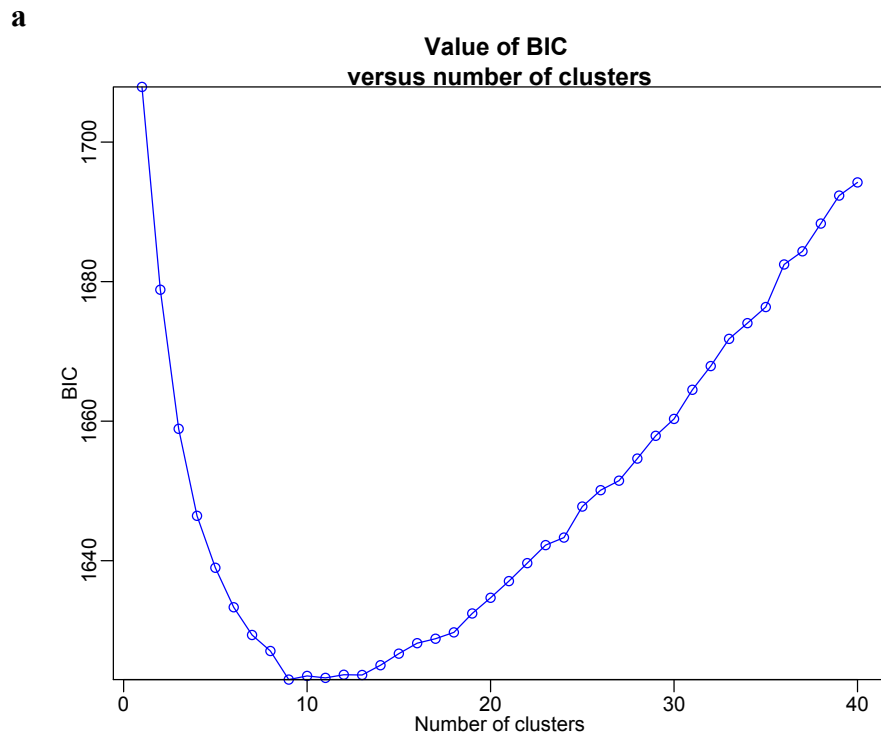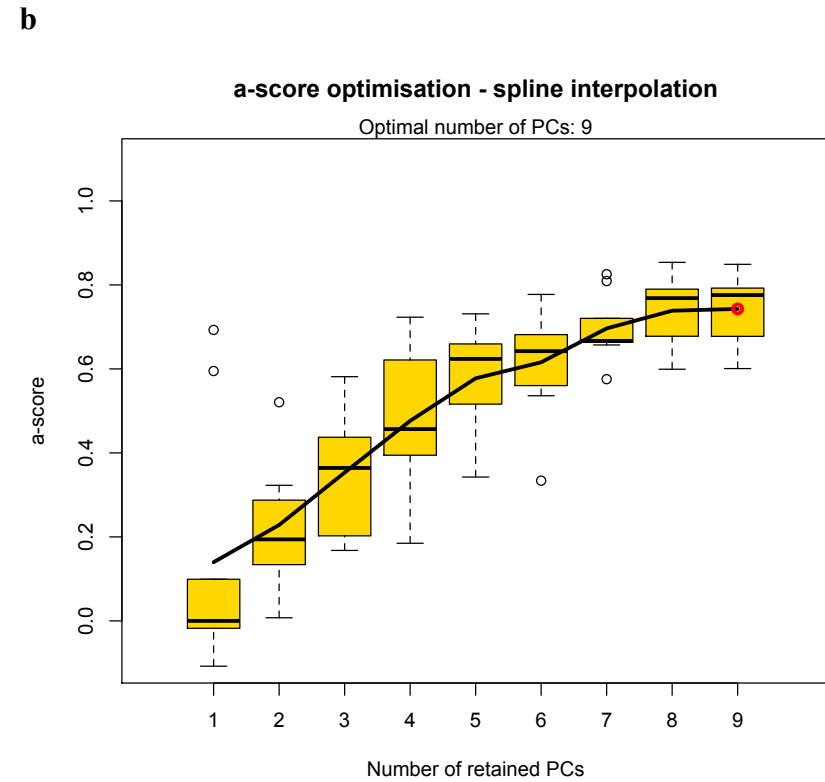

**Figure S2** Discriminant analysis of principal components (DAPC) analysis criteria. **a** Bayesian Information Criterion (BIC) plotted for increasing numbers of clusters, indicating the optimal number of clusters at  $k = 9$ . **b** Plot of a-score optimization based on the *adegenet* R package function *optim.a.score*, used to quantify the trade-off between discrimination power and over-fitting by calculating the difference between the proportion of observed and random discrimination, indicating the optimal number of principal components (PCs) to retain is nine<sup>7</sup>.

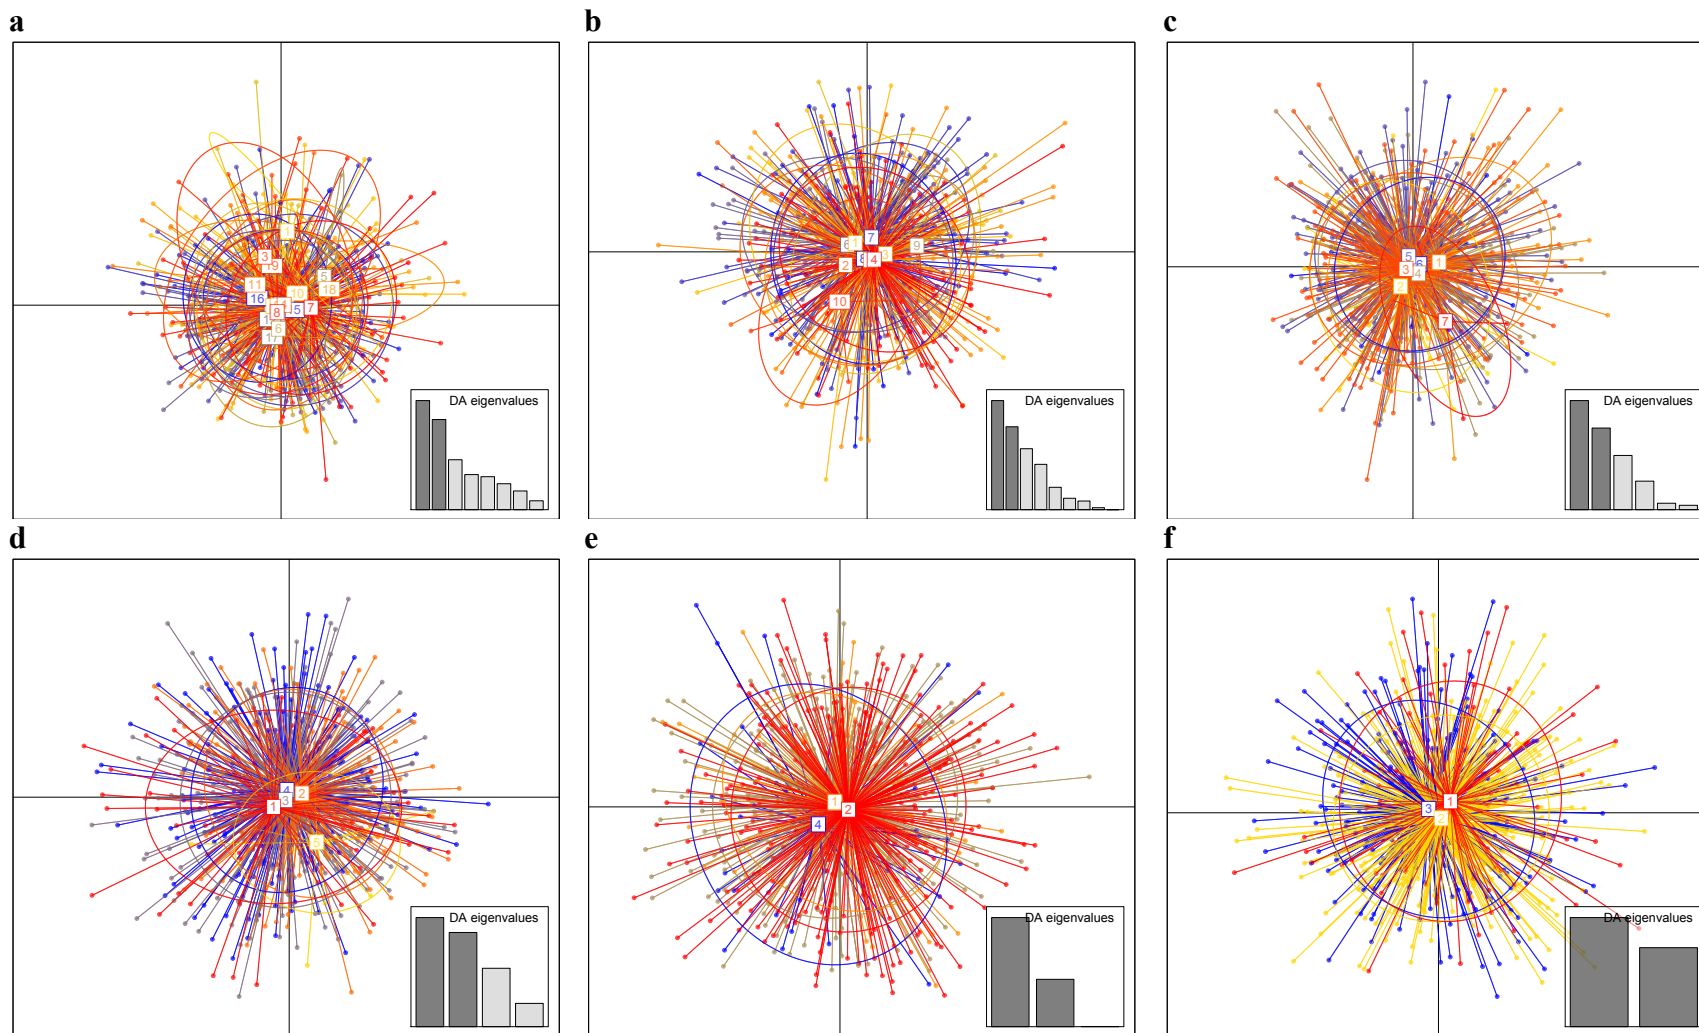

**Figure S3** Discriminant analysis of principal components (DAPC) clustering results for *Pleuragramma antarctica* based on location-independent SL groupings (as in Table S6a).

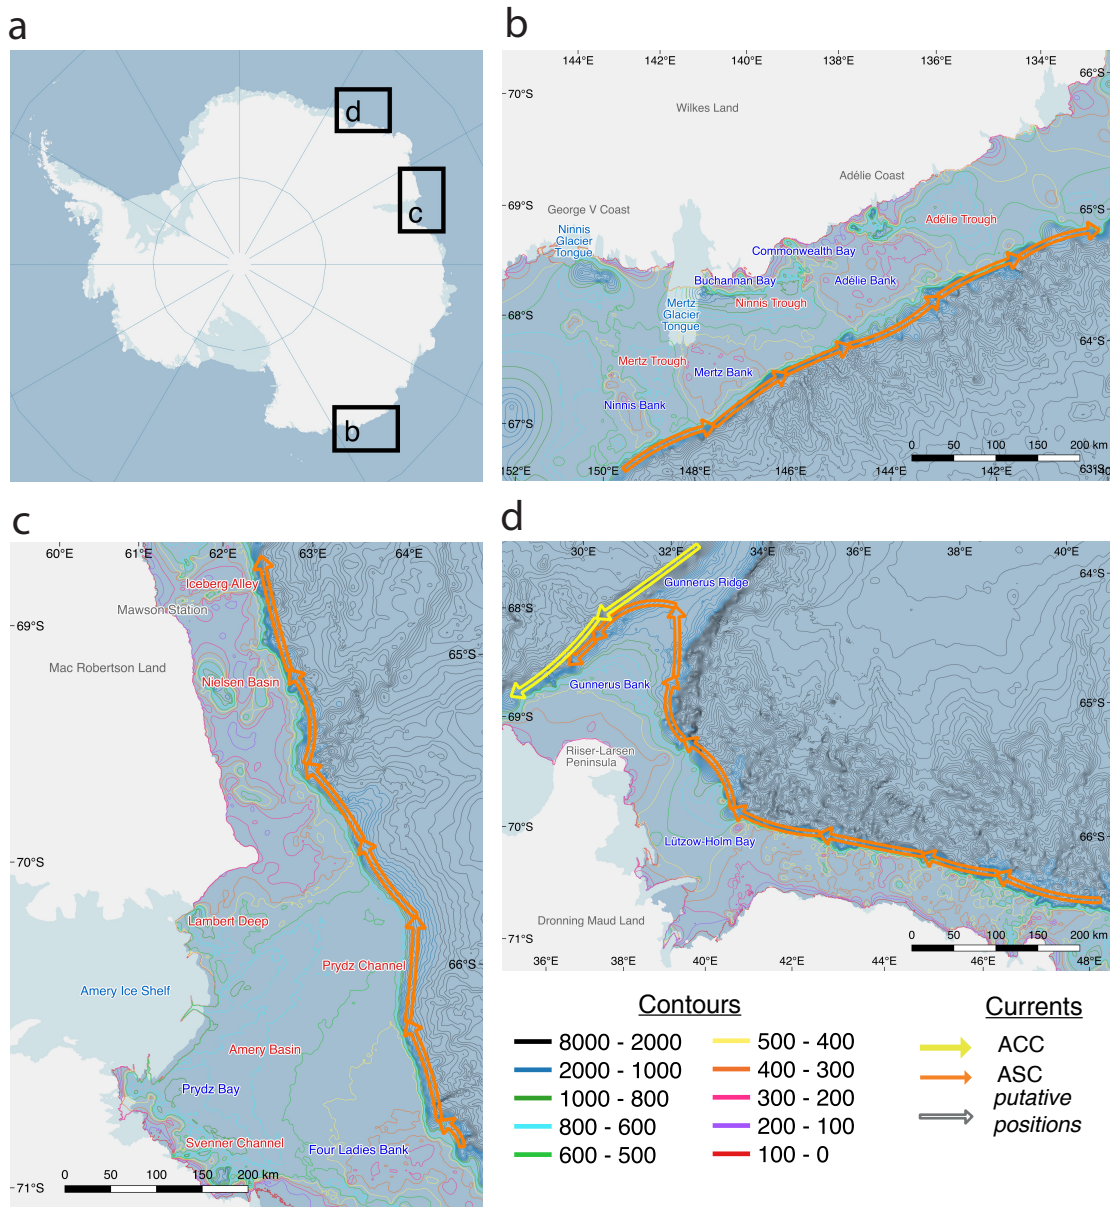

**Figure S4** East Antarctica. Arrows indicate suggested positions according to Fig.1 in Ryan *et al.*<sup>8</sup> and Whitworth *et al.*<sup>9</sup> for flow from the ACC and ASC, respectively. **a** Map of the Antarctic. Areas of interest in subsequent maps are indicated in squares and ordered by movement along the ASC. **b** George V and Adélie Coasts. **c** Prydz Bay north to Iceberg Alley. **d** Lützow Bay. Maps created using the Norwegian Polar Institute's Quantarctica 2.0 package<sup>10</sup> in the software QGIS version 2.18.9 <http://qgis.osgeo.org><sup>11</sup>.

## References

- 1 Carvajal-Rodriguez, A. & de Uña-Alvarez, J. Assessing Significance in High-Throughput Experiments by Sequential Goodness of Fit and q-Value Estimation. *PLoS one* **6**, e24700, <https://doi.org/10.1371/journal.pone.0024700> (2011).
- 2 Agostini, C. *et al.* Genetic differentiation in the ice-dependent fish *Pleuragramma antarctica* along the Antarctic Peninsula. *Journal of Biogeography* **42**, 1103-1113, <https://doi.org/10.1111/jbi.12497> (2015).
- 3 Molecular Ecology Resources Primer Development Consortium *et al.* Permanent genetic resources added to Molecular Ecology Resources Database 1 October 2010-30 November 2010. *Molecular ecology resources* **11**, 418-421, <https://doi.org/10.1111/j.1755-0998.2010.02970.x> (2011).
- 4 Molecular Ecology Resources Primer Development Consortium *et al.* Permanent Genetic Resources Added to Molecular Ecology Resources Database 1 April 2013-31 May 2013. *Molecular ecology resources* **13**, 966-968, <https://doi.org/10.1111/1755-0998.12140> (2013).
- 5 Ryman, N. & Palm, S. POWSIM: a computer program for assessing statistical power when testing for genetic differentiation. *Molecular Ecology Notes* **6**, 600-602, <https://doi.org/10.1111/j.1471-8286.2006.01378.x> (2006).
- 6 Duchesne, P. & Turgeon, J. FLOCK: a method for quick mapping of admixture without source samples. *Molecular ecology resources* **9**, 1333-1344, <http://dx.doi.org/10.1111/j.1755-0998.2009.02571.x> (2009).
- 7 Jombart, T. Adegenet: A R package for the multivariate analysis of genetic markers. *Bioinformatics* **24**, 1403-1405, <https://doi.org/10.1093/bioinformatics/btn129> (2008).
- 8 Ryan, S., Schröder, M., Huhn, O. & Timmermann, R. On the warm inflow at the eastern boundary of the Weddell Gyre. *Deep-Sea Research Part I: Oceanographic Research Papers* **107**, 70-81, <https://doi.org/10.1016/j.dsr.2015.11.002> (2016).
- 9 Whitworth, T., Orsi, A. H., Kim, S. J., Nowlin, W. D. & Locarnini, R. A. in *Ocean, Ice, and Atmosphere: Interactions at the Antarctic Continental Margin* 1-27 (American Geophysical Union, 1998).
- 10 Matsuoka, K., Skoglund, A. & Roth, G. Quantarctica [Data set]. <https://doi.org/10.21334/npolar.2018.8516e961> (2018).
- 11 QGIS Development Team. QGIS Geographic Information System. Open Source Geospatial Foundation Project., <https://qgis.org/en/site/index.html> (2018).
